# Supplementary material for: Clinical complexity and hospital admissions in the December holiday period
Source: PubMed Central journal article supplement (PMC7289422; doi:10.1371/journal.pone.0234112), 2020-06-11
Supplement: pone.0234112.s002.pdf [file pone.0234112.s002.pdf]

```
20 . qui log off
```

```
21 .
```

```
22 . tab unit
```

| Unit       | Freq. | Percent | Cum.   |
|------------|-------|---------|--------|
| MED 1      | 120   | 50.00   | 50.00  |
| MED 2      | 107   | 44.58   | 94.58  |
| Belgioioso | 13    | 5.42    | 100.00 |
| Total      | 240   | 100.00  |        |

```
23 . drop if unit=="Belgioioso": unit_ //pagati a giornata  
(13 observations deleted)
```

```
24 .
```

```
25 . set seed 1234
```

```
26 . display in smcl "{newpage}"
```

```

27 .
28 .
29 . *-----
30 . *(Q1)DESCRIPTIVES BY HOLIDAY CASE
31 . *-----
32 .
33 . //IMPORTANT NOTE:
34 . //IF MEAN AND MEDIAN CLOSE, USE MEDIAN AND SD + STUDENT T TEST
35 . //IF MEAN AND MEDIAN DIFFERENT, USE MEDIAN AND 25TH-75TH PERCENTILES + MANN WHITNEY U
> TEST
36 .
37 . tab SELECT

```

| SELECT          | Freq. | Percent | Cum.   |
|-----------------|-------|---------|--------|
| 15dec17-15jan18 | 63    | 27.75   | 27.75  |
| 16jan18-15feb18 | 58    | 25.55   | 53.30  |
| 15dec18-15jan19 | 43    | 18.94   | 72.25  |
| 16jan19-15feb19 | 63    | 27.75   | 100.00 |
| Total           | 227   | 100.00  |        |

```

38 . tab CASE

```

| HolidayCase | Freq. | Percent | Cum.   |
|-------------|-------|---------|--------|
| regular     | 121   | 53.30   | 53.30  |
| holiday     | 106   | 46.70   | 100.00 |
| Total       | 227   | 100.00  |        |

```

39 .
40 . *1) DEMOGRAPHIC
41 .
42 . local DEMc age bmi
43 .
44 . foreach var of local DEMc {
2.     di _newl "`var' & CASE"
3.     di _newl
4.     tabstat `var', by(CASE) c(s) s(n mea sd min q max) f(%4.2f)
5.     ttest `var', by(CASE)
6.     //ranksum `var', by(CASE)

```

```
45 .      di _newl
      7.      }
```

\*age & CASE

Summary for variables: age  
by categories of: CASE (HolidayCase)

| CASE    | N      | mean  | sd    | min   | p25   | p50   | p75   |
|---------|--------|-------|-------|-------|-------|-------|-------|
| regular | 121.00 | 74.39 | 16.67 | 18.00 | 66.00 | 80.00 | 86.00 |
| holiday | 106.00 | 79.42 | 12.82 | 27.00 | 75.00 | 82.50 | 88.00 |
| Total   | 227.00 | 76.74 | 15.17 | 18.00 | 72.00 | 81.00 | 87.00 |

| CASE    | max   |
|---------|-------|
| regular | 96.00 |
| holiday | 98.00 |
| Total   | 98.00 |

Two-sample t test with equal variances

| Group    | Obs | Mean      | Std. Err. | Std. Dev. | [95% Conf. Interval] |           |
|----------|-----|-----------|-----------|-----------|----------------------|-----------|
| regular  | 121 | 74.38843  | 1.515002  | 16.66502  | 71.38883             | 77.38803  |
| holiday  | 106 | 79.41509  | 1.245431  | 12.8225   | 76.94563             | 81.88455  |
| combined | 227 | 76.73568  | 1.006955  | 15.17131  | 74.75146             | 78.7199   |
| diff     |     | -5.026665 | 1.994851  |           | -8.957645            | -1.095684 |

diff = mean(**regular**) - mean(**holiday**) t = -2.5198  
 Ho: diff = 0 degrees of freedom = 225

Ha: diff < 0 Ha: diff != 0 Ha: diff > 0  
 Pr(T < t) = **0.0062** Pr(|T| > |t|) = **0.0124** Pr(T > t) = **0.9938**

\*bmi & CASE

Summary for variables: bmi  
by categories of: CASE (HolidayCase)

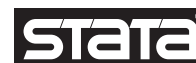

| CASE    | N      | mean  | sd   | min   | p25   | p50   | p75   |
|---------|--------|-------|------|-------|-------|-------|-------|
| regular | 121.00 | 25.57 | 5.76 | 14.17 | 21.55 | 24.09 | 28.34 |
| holiday | 106.00 | 25.36 | 5.14 | 15.23 | 21.60 | 24.77 | 29.30 |
| Total   | 227.00 | 25.47 | 5.47 | 14.17 | 21.55 | 24.49 | 28.89 |

| CASE    | max   |
|---------|-------|
| regular | 53.95 |
| holiday | 39.06 |
| Total   | 53.95 |

Two-sample t test with equal variances

| Group    | Obs | Mean     | Std. Err. | Std. Dev. | [95% Conf. Interval] |          |
|----------|-----|----------|-----------|-----------|----------------------|----------|
| regular  | 121 | 25.56983 | .5236019  | 5.759621  | 24.53314             | 26.60653 |
| holiday  | 106 | 25.35953 | .4987932  | 5.135391  | 24.37051             | 26.34854 |
| combined | 227 | 25.47163 | .3627948  | 5.466055  | 24.75674             | 26.18652 |
| diff     |     | .2103065 | .7286582  |           | -1.225561            | 1.646174 |

diff = mean(**regular**) - mean(**holiday**) t = 0.2886  
 Ho: diff = 0 degrees of freedom = 225

Ha: diff < 0 Ha: diff != 0 Ha: diff > 0  
 Pr(T < t) = 0.6134 Pr(|T| > |t|) = 0.7731 Pr(T > t) = 0.3866

```

46 .
47 . local DEM age_75_years sex BMIclass schooling
48 .
49 . foreach var of local DEM {
    2.     di _newl "*`var' & CASE"
    3.     di _newl
    4.     tab `var' CASE, r co ex
    5.     nptrend `var', by(CASE)
    6.     di _newl
    7.     }

*age_75_years & CASE
    
```

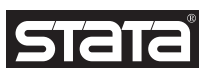

|                          |
|--------------------------|
| Key                      |
| <i>frequency</i>         |
| <i>row percentage</i>    |
| <i>column percentage</i> |

| Age >= 75<br>years | HolidayCase |         | Total  |
|--------------------|-------------|---------|--------|
|                    | regular     | holiday |        |
| No                 | 42          | 23      | 65     |
|                    | 64.62       | 35.38   | 100.00 |
|                    | 34.71       | 21.70   | 28.63  |
| Yes                | 79          | 83      | 162    |
|                    | 48.77       | 51.23   | 100.00 |
|                    | 65.29       | 78.30   | 71.37  |
| Total              | 121         | 106     | 227    |
|                    | 53.30       | 46.70   | 100.00 |
|                    | 100.00      | 100.00  | 100.00 |

Fisher's exact = 0.039  
 1-sided Fisher's exact = 0.021

| CASE           | score | obs | sum of ranks |
|----------------|-------|-----|--------------|
| <b>regular</b> | 0     | 121 | 12959.5      |
| <b>holiday</b> | 1     | 106 | 12918.5      |

z = 2.16  
 Prob > |z| = 0.031

**\*sex & CASE**

|                          |
|--------------------------|
| Key                      |
| <i>frequency</i>         |
| <i>row percentage</i>    |
| <i>column percentage</i> |

| Sex   | HolidayCase |         | Total  |
|-------|-------------|---------|--------|
|       | regular     | holiday |        |
| M     | 65          | 51      | 116    |
|       | 56.03       | 43.97   | 100.00 |
|       | 53.72       | 48.11   | 51.10  |
| F     | 56          | 55      | 111    |
|       | 50.45       | 49.55   | 100.00 |
|       | 46.28       | 51.89   | 48.90  |
| Total | 121         | 106     | 227    |
|       | 53.30       | 46.70   | 100.00 |
|       | 100.00      | 100.00  | 100.00 |

Fisher's exact = 0.427  
 1-sided Fisher's exact = 0.239

| CASE           | score    | obs        | sum of ranks   |
|----------------|----------|------------|----------------|
| <b>regular</b> | <b>0</b> | <b>121</b> | <b>13434.5</b> |
| <b>holiday</b> | <b>1</b> | <b>106</b> | <b>12443.5</b> |

z = 0.84  
 Prob > |z| = 0.400

**\*BMIClass & CASE**

|                          |
|--------------------------|
| Key                      |
| <i>frequency</i>         |
| <i>row percentage</i>    |
| <i>column percentage</i> |

Enumerating sample-space combinations:

- stage 4: enumerations = 1
- stage 3: enumerations = 2
- stage 2: enumerations = 3
- stage 1: enumerations = 0

| BMIclass  | HolidayCase |         | Total  |
|-----------|-------------|---------|--------|
|           | regular     | holiday |        |
| <18.5     | 6           | 6       | 12     |
|           | 50.00       | 50.00   | 100.00 |
|           | 4.96        | 5.66    | 5.29   |
| [18.5 25[ | 61          | 52      | 113    |
|           | 53.98       | 46.02   | 100.00 |
|           | 50.41       | 49.06   | 49.78  |
| [25 30[   | 32          | 27      | 59     |
|           | 54.24       | 45.76   | 100.00 |
|           | 26.45       | 25.47   | 25.99  |
| >=30      | 22          | 21      | 43     |
|           | 51.16       | 48.84   | 100.00 |
|           | 18.18       | 19.81   | 18.94  |
| Total     | 121         | 106     | 227    |
|           | 53.30       | 46.70   | 100.00 |
|           | 100.00      | 100.00  | 100.00 |

Fisher's exact = 0.981

| CASE           | score | obs | sum of ranks |
|----------------|-------|-----|--------------|
| <b>regular</b> | 0     | 121 | 13740        |
| <b>holiday</b> | 1     | 106 | 12138        |

z = 0.12  
 Prob > |z| = 0.906

**\*schooling & CASE**

|                          |
|--------------------------|
| Key                      |
| <i>frequency</i>         |
| <i>row percentage</i>    |
| <i>column percentage</i> |

Enumerating sample-space combinations:

- stage 4: enumerations = 1
- stage 3: enumerations = 7
- stage 2: enumerations = 58
- stage 1: enumerations = 0

| Schooling   | HolidayCase |         | Total  |
|-------------|-------------|---------|--------|
|             | regular     | holiday |        |
| < = 5 years | 55          | 59      | 114    |
|             | 48.25       | 51.75   | 100.00 |
|             | 45.45       | 55.66   | 50.22  |
| 6-8 years   | 40          | 23      | 63     |
|             | 63.49       | 36.51   | 100.00 |
|             | 33.06       | 21.70   | 27.75  |
| 9-13 years  | 19          | 18      | 37     |
|             | 51.35       | 48.65   | 100.00 |
|             | 15.70       | 16.98   | 16.30  |
| > 13 years  | 7           | 6       | 13     |
|             | 53.85       | 46.15   | 100.00 |
|             | 5.79        | 5.66    | 5.73   |
| Total       | 121         | 106     | 227    |
|             | 53.30       | 46.70   | 100.00 |
|             | 100.00      | 100.00  | 100.00 |

Fisher's exact = 0.269

| CASE           | score | obs | sum of ranks |
|----------------|-------|-----|--------------|
| <b>regular</b> | 0     | 121 | 14273.5      |
| <b>holiday</b> | 1     | 106 | 11604.5      |

z = -1.06  
 Prob > |z| = 0.291

```
50 .
51 . display in smcl "{newpage}"
```



```

52 .
53 .
54 . *2) MEDICAL HISTORY
55 .
56 .
57 . local INDC cirs_severity_index cirs_comorbidity_index edmonton_frail_score ///
>     barthel_index short_blssed_score

58 .
59 . foreach var of local INDC      {
    2.     di _newl "*`var' & CASE"
    3.     di _newl
    4.     tabstat `var', by(CASE) c(s)  s(n mea sd min q max) f(%4.2f)
    5.     //ttest `var', by(CASE)
60 .     ranksum `var', by(CASE)
    6.     di _newl
    7.     }

```

\*cirs\_severity\_index & CASE

Summary for variables: cirs\_severity\_index  
by categories of: CASE (HolidayCase)

| CASE    | N             | mean        | sd          | min         | p25         | p50         | p75         |
|---------|---------------|-------------|-------------|-------------|-------------|-------------|-------------|
| regular | <b>121.00</b> | <b>1.76</b> | <b>0.31</b> | <b>1.15</b> | <b>1.54</b> | <b>1.77</b> | <b>1.92</b> |
| holiday | <b>106.00</b> | <b>1.80</b> | <b>0.28</b> | <b>1.23</b> | <b>1.62</b> | <b>1.77</b> | <b>2.00</b> |
| Total   | <b>227.00</b> | <b>1.78</b> | <b>0.30</b> | <b>1.15</b> | <b>1.54</b> | <b>1.77</b> | <b>2.00</b> |

| CASE    | max         |
|---------|-------------|
| regular | <b>2.54</b> |
| holiday | <b>2.38</b> |
| Total   | <b>2.54</b> |

Two-sample Wilcoxon rank-sum (Mann-Whitney) test

| CASE     | obs        | rank sum       | expected     |
|----------|------------|----------------|--------------|
| regular  | <b>121</b> | <b>13206.5</b> | <b>13794</b> |
| holiday  | <b>106</b> | <b>12671.5</b> | <b>12084</b> |
| combined | <b>227</b> | <b>25878</b>   | <b>25878</b> |

```
unadjusted variance    243694.00
adjustment for ties    -1629.44
-----
adjusted variance      242064.56
```

```
Ho: cirs_s~x(CASE==regular) = cirs_s~x(CASE==holiday)
      z = -1.194
Prob > |z| = 0.2324
```

**\*cirs\_comorbidity\_index & CASE**

Summary for variables: cirs\_comorbidity\_index  
by categories of: CASE (HolidayCase)

| CASE    | N      | mean | sd   | min  | p25  | p50  | p75  |
|---------|--------|------|------|------|------|------|------|
| regular | 121.00 | 3.50 | 1.62 | 1.00 | 2.00 | 3.00 | 4.00 |
| holiday | 106.00 | 3.74 | 1.53 | 1.00 | 3.00 | 4.00 | 5.00 |
| Total   | 227.00 | 3.61 | 1.58 | 1.00 | 2.00 | 4.00 | 5.00 |

| CASE    | max  |
|---------|------|
| regular | 8.00 |
| holiday | 7.00 |
| Total   | 8.00 |

Two-sample Wilcoxon rank-sum (Mann-Whitney) test

| CASE     | obs | rank sum | expected |
|----------|-----|----------|----------|
| regular  | 121 | 13211.5  | 13794    |
| holiday  | 106 | 12666.5  | 12084    |
| combined | 227 | 25878    | 25878    |

```
unadjusted variance    243694.00
adjustment for ties    -8147.94
-----
adjusted variance      235546.06
```

```
Ho: cirs_c~x(CASE==regular) = cirs_c~x(CASE==holiday)
      z = -1.200
Prob > |z| = 0.2301
```

**\*edmonton\_frail\_score & CASE**

Summary for variables: edmonton\_frail\_score  
by categories of: CASE (HolidayCase)

| CASE    | N      | mean | sd   | min  | p25  | p50  | p75   |
|---------|--------|------|------|------|------|------|-------|
| regular | 121.00 | 6.46 | 3.17 | 0.00 | 4.00 | 7.00 | 9.00  |
| holiday | 106.00 | 8.08 | 2.83 | 1.00 | 6.00 | 8.00 | 10.00 |
| Total   | 227.00 | 7.22 | 3.11 | 0.00 | 5.00 | 8.00 | 9.00  |

| CASE    | max   |
|---------|-------|
| regular | 13.00 |
| holiday | 15.00 |
| Total   | 15.00 |

Two-sample Wilcoxon rank-sum (Mann-Whitney) test

| CASE     | obs | rank sum | expected |
|----------|-----|----------|----------|
| regular  | 121 | 12095.5  | 13794    |
| holiday  | 106 | 13782.5  | 12084    |
| combined | 227 | 25878    | 25878    |

unadjusted variance    **243694.00**  
 adjustment for ties    **-2716.73**  


---

 adjusted variance    **240977.27**

Ho: edmont~e(CASE==regular) = edmont~e(CASE==holiday)  
           z = **-3.460**  
           Prob > |z| = **0.0005**

**\*barthel\_index & CASE**

Summary for variables: barthel\_index  
by categories of: CASE (HolidayCase)

| CASE    | N      | mean  | sd    | min   | p25   | p50   | p75    |
|---------|--------|-------|-------|-------|-------|-------|--------|
| regular | 121.00 | 83.45 | 21.10 | 18.00 | 71.00 | 95.00 | 100.00 |
| holiday | 106.00 | 79.11 | 25.52 | 0.00  | 66.00 | 90.50 | 99.00  |
| Total   | 227.00 | 81.42 | 23.32 | 0.00  | 69.00 | 93.00 | 100.00 |

| CASE    | max    |
|---------|--------|
| regular | 100.00 |
| holiday | 100.00 |
| Total   | 100.00 |

Two-sample Wilcoxon rank-sum (Mann-Whitney) test

| CASE     | obs | rank sum | expected |
|----------|-----|----------|----------|
| regular  | 121 | 14336.5  | 13794    |
| holiday  | 106 | 11541.5  | 12084    |
| combined | 227 | 25878    | 25878    |

unadjusted variance 243694.00  
 adjustment for ties -4722.18  


---

 adjusted variance 238971.82

Ho: barthe~x(CASE==regular) = barthe~x(CASE==holiday)  
 z = 1.110  
 Prob > |z| = 0.2671

**\*short\_blsed\_score & CASE**

Summary for variables: short\_blsed\_score  
 by categories of: CASE (HolidayCase)

| CASE    | N      | mean  | sd    | min  | p25  | p50   | p75   |
|---------|--------|-------|-------|------|------|-------|-------|
| regular | 121.00 | 10.38 | 10.45 | 0.00 | 0.00 | 7.00  | 18.00 |
| holiday | 106.00 | 13.02 | 9.30  | 0.00 | 6.00 | 12.00 | 21.00 |
| Total   | 227.00 | 11.61 | 10.00 | 0.00 | 2.00 | 10.00 | 20.00 |

| CASE    | max          |
|---------|--------------|
| regular | <b>28.00</b> |
| holiday | <b>28.00</b> |
| Total   | <b>28.00</b> |

Two-sample Wilcoxon rank-sum (Mann-Whitney) test

| CASE     | obs        | rank sum       | expected     |
|----------|------------|----------------|--------------|
| regular  | <b>121</b> | <b>12563.5</b> | <b>13794</b> |
| holiday  | <b>106</b> | <b>13314.5</b> | <b>12084</b> |
| combined | <b>227</b> | <b>25878</b>   | <b>25878</b> |

unadjusted variance    **243694.00**  
 adjustment for ties    **-3977.78**  


---

 adjusted variance       **239716.22**

Ho: short\_~e(CASE==regular) = short\_~e(CASE==holiday)  
       z = **-2.513**  
       Prob > |z| = **0.0120**

```
61 .
62 . local A_DIAG CAPADMicd9cm1 CAPADMicd9cm2 CAPADMicd9cm3
63 .
64 . foreach var of local A_DIAG      {
      2.      di _newl "*"var' & CASE (no test, description only"
      3.      di _newl
      4.      tab `var' CASE, r co
      5.      di _newl
      6.      }

*CAPADMicd9cm1 & CASE (no test, description only
```

|                          |
|--------------------------|
| Key                      |
| <i>frequency</i>         |
| <i>row percentage</i>    |
| <i>column percentage</i> |

| CAPADMicd9cm1 | HolidayCase          |                      | Total                 |
|---------------|----------------------|----------------------|-----------------------|
|               | regular              | holiday              |                       |
| 1-infett      | 1<br>100.00<br>0.83  | 0<br>0.00<br>0.00    | 1<br>100.00<br>0.44   |
| 2-tumori      | 0<br>0.00<br>0.00    | 1<br>100.00<br>0.94  | 1<br>100.00<br>0.44   |
| 3-endocrino   | 1<br>12.50<br>0.83   | 7<br>87.50<br>6.60   | 8<br>100.00<br>3.52   |
| 4-ematol      | 10<br>58.82<br>8.26  | 7<br>41.18<br>6.60   | 17<br>100.00<br>7.49  |
| 5-mental      | 3<br>100.00<br>2.48  | 0<br>0.00<br>0.00    | 3<br>100.00<br>1.32   |
| 6-neurol      | 4<br>80.00<br>3.31   | 1<br>20.00<br>0.94   | 5<br>100.00<br>2.20   |
| 7-circol      | 34<br>54.84<br>28.10 | 28<br>45.16<br>26.42 | 62<br>100.00<br>27.31 |
| 8-respir      | 38<br>53.52<br>31.40 | 33<br>46.48<br>31.13 | 71<br>100.00<br>31.28 |
| 9-digerente   | 4<br>40.00<br>3.31   | 6<br>60.00<br>5.66   | 10<br>100.00<br>4.41  |
| 10-genitur    | 2<br>33.33<br>1.65   | 4<br>66.67<br>3.77   | 6<br>100.00<br>2.64   |
| 12-pelle      | 1<br>100.00<br>0.83  | 0<br>0.00<br>0.00    | 1<br>100.00<br>0.44   |
| 13-osteomusc  | 2<br>100.00<br>1.65  | 0<br>0.00<br>0.00    | 2<br>100.00<br>0.88   |
| 16-sintomi    | 15<br>50.00          | 15<br>50.00          | 30<br>100.00          |

|           | 12.40                  | 14.15                  | 13.22                   |
|-----------|------------------------|------------------------|-------------------------|
| 17-traumi | 5<br>55.56<br>4.13     | 4<br>44.44<br>3.77     | 9<br>100.00<br>3.96     |
| vXX       | 1<br>100.00<br>0.83    | 0<br>0.00<br>0.00      | 1<br>100.00<br>0.44     |
| Total     | 121<br>53.30<br>100.00 | 106<br>46.70<br>100.00 | 227<br>100.00<br>100.00 |

\*CAPADMicd9cm2 & CASE (no test, description only)

|                          |
|--------------------------|
| Key                      |
| <i>frequency</i>         |
| <i>row percentage</i>    |
| <i>column percentage</i> |

| CAPADMicd9cm2 | HolidayCase         |                     | Total                |
|---------------|---------------------|---------------------|----------------------|
|               | regular             | holiday             |                      |
| 1-infett      | 1<br>50.00<br>1.89  | 1<br>50.00<br>1.72  | 2<br>100.00<br>1.80  |
| 2-tumori      | 1<br>50.00<br>1.89  | 1<br>50.00<br>1.72  | 2<br>100.00<br>1.80  |
| 3-endocrino   | 5<br>45.45<br>9.43  | 6<br>54.55<br>10.34 | 11<br>100.00<br>9.91 |
| 4-ematol      | 1<br>16.67<br>1.89  | 5<br>83.33<br>8.62  | 6<br>100.00<br>5.41  |
| 5-mental      | 2<br>100.00<br>3.77 | 0<br>0.00<br>0.00   | 2<br>100.00<br>1.80  |
| 6-neurol      | 1<br>50.00          | 1<br>50.00          | 2<br>100.00          |

|              |                       |                       |                         |
|--------------|-----------------------|-----------------------|-------------------------|
|              | 1.89                  | 1.72                  | 1.80                    |
| 7-circol     | 11<br>39.29<br>20.75  | 17<br>60.71<br>29.31  | 28<br>100.00<br>25.23   |
| 8-respir     | 18<br>50.00<br>33.96  | 18<br>50.00<br>31.03  | 36<br>100.00<br>32.43   |
| 9-digerente  | 5<br>83.33<br>9.43    | 1<br>16.67<br>1.72    | 6<br>100.00<br>5.41     |
| 10-genitur   | 4<br>50.00<br>7.55    | 4<br>50.00<br>6.90    | 8<br>100.00<br>7.21     |
| 13-osteomusc | 1<br>100.00<br>1.89   | 0<br>0.00<br>0.00     | 1<br>100.00<br>0.90     |
| 16-sintomi   | 2<br>33.33<br>3.77    | 4<br>66.67<br>6.90    | 6<br>100.00<br>5.41     |
| 17-traumi    | 1<br>100.00<br>1.89   | 0<br>0.00<br>0.00     | 1<br>100.00<br>0.90     |
| Total        | 53<br>47.75<br>100.00 | 58<br>52.25<br>100.00 | 111<br>100.00<br>100.00 |

\*CAPADmicd9cm3 & CASE (no test, description only)

|                          |
|--------------------------|
| Key                      |
| <i>frequency</i>         |
| <i>row percentage</i>    |
| <i>column percentage</i> |



| CAPADMicd9cm3 | HolidayCase |         | Total  |
|---------------|-------------|---------|--------|
|               | regular     | holiday |        |
| 2-tumori      | 2           | 0       | 2      |
|               | 100.00      | 0.00    | 100.00 |
|               | 10.00       | 0.00    | 5.71   |
| 3-endocrino   | 2           | 0       | 2      |
|               | 100.00      | 0.00    | 100.00 |
|               | 10.00       | 0.00    | 5.71   |
| 4-ematol      | 0           | 2       | 2      |
|               | 0.00        | 100.00  | 100.00 |
|               | 0.00        | 13.33   | 5.71   |
| 5-mental      | 0           | 1       | 1      |
|               | 0.00        | 100.00  | 100.00 |
|               | 0.00        | 6.67    | 2.86   |
| 7-circol      | 4           | 3       | 7      |
|               | 57.14       | 42.86   | 100.00 |
|               | 20.00       | 20.00   | 20.00  |
| 8-respir      | 5           | 3       | 8      |
|               | 62.50       | 37.50   | 100.00 |
|               | 25.00       | 20.00   | 22.86  |
| 10-genitur    | 3           | 2       | 5      |
|               | 60.00       | 40.00   | 100.00 |
|               | 15.00       | 13.33   | 14.29  |
| 16-sintomi    | 3           | 2       | 5      |
|               | 60.00       | 40.00   | 100.00 |
|               | 15.00       | 13.33   | 14.29  |
| 17-traumi     | 1           | 1       | 2      |
|               | 50.00       | 50.00   | 100.00 |
|               | 5.00        | 6.67    | 5.71   |
| vXX           | 0           | 1       | 1      |
|               | 0.00        | 100.00  | 100.00 |
|               | 0.00        | 6.67    | 2.86   |
| Total         | 20          | 15      | 35     |
|               | 57.14       | 42.86   | 100.00 |
|               | 100.00      | 100.00  | 100.00 |

```

65 .
66 .
67 . local CIRS cardiac hypertension vascular respiratory eent upper_gi lower_gi ///
    >      hepatic renal other_gu musculo_skeletal_integum neurological ///
    >      endocrine_metabolic psychiatric_behavioral
68 .
69 . foreach var of local CIRS      {
    2.      di _newl "*" `var' & CASE"
    3.      di _newl
    4.      tab `var' CASE, r co ex
    5.      nptrend `var', by(CASE)
    6.      di _newl
    7.      }

```

\*cardiac & CASE

|                          |
|--------------------------|
| Key                      |
| <i>frequency</i>         |
| <i>row percentage</i>    |
| <i>column percentage</i> |

Enumerating sample-space combinations:

```

stage 5: enumerations = 1
stage 4: enumerations = 3
stage 3: enumerations = 7
stage 2: enumerations = 38
stage 1: enumerations = 0

```

| 1. Cardiac<br>(heart<br>only) | HolidayCase |         | Total  |
|-------------------------------|-------------|---------|--------|
|                               | regular     | holiday |        |
| 1                             | 47          | 33      | 80     |
|                               | 58.75       | 41.25   | 100.00 |
|                               | 38.84       | 31.13   | 35.24  |
| 2                             | 3           | 5       | 8      |
|                               | 37.50       | 62.50   | 100.00 |
|                               | 2.48        | 4.72    | 3.52   |
| 3                             | 32          | 30      | 62     |
|                               | 51.61       | 48.39   | 100.00 |
|                               | 26.45       | 28.30   | 27.31  |
| 4                             | 38          | 37      | 75     |
|                               | 50.67       | 49.33   | 100.00 |
|                               | 31.40       | 34.91   | 33.04  |

|       |        |        |        |
|-------|--------|--------|--------|
| 5     | 1      | 1      | 2      |
|       | 50.00  | 50.00  | 100.00 |
|       | 0.83   | 0.94   | 0.88   |
| Total | 121    | 106    | 227    |
|       | 53.30  | 46.70  | 100.00 |
|       | 100.00 | 100.00 | 100.00 |

Fisher's exact = 0.730

| CASE           | score | obs | sum of ranks |
|----------------|-------|-----|--------------|
| <b>regular</b> | 0     | 121 | 13351.5      |
| <b>holiday</b> | 1     | 106 | 12526.5      |

z = 0.94  
 Prob > |z| = 0.345

**\*hypertension & CASE**

|                          |
|--------------------------|
| Key                      |
| <i>frequency</i>         |
| <i>row percentage</i>    |
| <i>column percentage</i> |

Enumerating sample-space combinations:

- stage 4: enumerations = 1
- stage 3: enumerations = 2
- stage 2: enumerations = 19
- stage 1: enumerations = 0

|    |                                                                               |         |        |
|----|-------------------------------------------------------------------------------|---------|--------|
| 2. | Hypertension (rating is based on severity; affected systems are rated separat |         |        |
|    | HolidayCase                                                                   |         |        |
|    | regular                                                                       | holiday | Total  |
| 1  | 38                                                                            | 24      | 62     |
|    | 61.29                                                                         | 38.71   | 100.00 |
|    | 31.40                                                                         | 22.64   | 27.31  |

|       |                        |                        |                         |
|-------|------------------------|------------------------|-------------------------|
| 2     | 48<br>49.48<br>39.67   | 49<br>50.52<br>46.23   | 97<br>100.00<br>42.73   |
| 3     | 34<br>50.75<br>28.10   | 33<br>49.25<br>31.13   | 67<br>100.00<br>29.52   |
| 4     | 1<br>100.00<br>0.83    | 0<br>0.00<br>0.00      | 1<br>100.00<br>0.44     |
| Total | 121<br>53.30<br>100.00 | 106<br>46.70<br>100.00 | 227<br>100.00<br>100.00 |

Fisher's exact = 0.343

| CASE           | score | obs | sum of ranks |
|----------------|-------|-----|--------------|
| <b>regular</b> | 0     | 121 | 13314        |
| <b>holiday</b> | 1     | 106 | 12564        |

z = 1.04  
 Prob > |z| = 0.299

**\*vascular & CASE**

|                          |
|--------------------------|
| Key                      |
| <i>frequency</i>         |
| <i>row percentage</i>    |
| <i>column percentage</i> |

Enumerating sample-space combinations:

- stage 5: enumerations = 1
- stage 4: enumerations = 2
- stage 3: enumerations = 4
- stage 2: enumerations = 11
- stage 1: enumerations = 0

| 3.<br>Vascular<br>(blood,<br>blood<br>vessels<br>and cells,<br>marrow,<br>spleen,<br>lymphatics<br>) | HolidayCase            |                        | Total                   |
|------------------------------------------------------------------------------------------------------|------------------------|------------------------|-------------------------|
|                                                                                                      | regular                | holiday                |                         |
| 1                                                                                                    | 50<br>52.08<br>41.32   | 46<br>47.92<br>43.40   | 96<br>100.00<br>42.29   |
| 2                                                                                                    | 21<br>50.00<br>17.36   | 21<br>50.00<br>19.81   | 42<br>100.00<br>18.50   |
| 3                                                                                                    | 40<br>54.79<br>33.06   | 33<br>45.21<br>31.13   | 73<br>100.00<br>32.16   |
| 4                                                                                                    | 9<br>60.00<br>7.44     | 6<br>40.00<br>5.66     | 15<br>100.00<br>6.61    |
| 5                                                                                                    | 1<br>100.00<br>0.83    | 0<br>0.00<br>0.00      | 1<br>100.00<br>0.44     |
| Total                                                                                                | 121<br>53.30<br>100.00 | 106<br>46.70<br>100.00 | 227<br>100.00<br>100.00 |

Fisher's exact = 0.936

| CASE    | score | obs | sum of ranks |
|---------|-------|-----|--------------|
| regular | 0     | 121 | 14090.5      |
| holiday | 1     | 106 | 11787.5      |

z = -0.64  
 Prob > |z| = 0.523

\*respiratory & CASE

|                          |
|--------------------------|
| Key                      |
| <i>frequency</i>         |
| <i>row percentage</i>    |
| <i>column percentage</i> |

Enumerating sample-space combinations:

stage 5: enumerations = 1  
 stage 4: enumerations = 3  
 stage 3: enumerations = 12  
 stage 2: enumerations = 62  
 stage 1: enumerations = 0

| 4.<br>Respirator<br>y (lungs,<br>bronchi,<br>trachea<br>below the<br>larynx) | HolidayCase            |                        | Total                   |
|------------------------------------------------------------------------------|------------------------|------------------------|-------------------------|
|                                                                              | regular                | holiday                |                         |
| 1                                                                            | 62<br>55.36<br>51.24   | 50<br>44.64<br>47.17   | 112<br>100.00<br>49.34  |
| 2                                                                            | 7<br>53.85<br>5.79     | 6<br>46.15<br>5.66     | 13<br>100.00<br>5.73    |
| 3                                                                            | 18<br>42.86<br>14.88   | 24<br>57.14<br>22.64   | 42<br>100.00<br>18.50   |
| 4                                                                            | 33<br>56.90<br>27.27   | 25<br>43.10<br>23.58   | 58<br>100.00<br>25.55   |
| 5                                                                            | 1<br>50.00<br>0.83     | 1<br>50.00<br>0.94     | 2<br>100.00<br>0.88     |
| Total                                                                        | 121<br>53.30<br>100.00 | 106<br>46.70<br>100.00 | 227<br>100.00<br>100.00 |

Fisher's exact = 0.665

| CASE           | score | obs | sum of ranks |
|----------------|-------|-----|--------------|
| <b>regular</b> | 0     | 121 | 13684        |
| <b>holiday</b> | 1     | 106 | 12194        |

z = 0.24  
 Prob > |z| = 0.810

\*eent & CASE

|                          |
|--------------------------|
| Key                      |
| <i>frequency</i>         |
| <i>row percentage</i>    |
| <i>column percentage</i> |

Enumerating sample-space combinations:

stage 4: enumerations = 1  
 stage 3: enumerations = 2  
 stage 2: enumerations = 9  
 stage 1: enumerations = 0

| 5. EENT<br>(eye, ear,<br>nose,<br>throat,<br>larynx) | HolidayCase |         | Total  |
|------------------------------------------------------|-------------|---------|--------|
|                                                      | regular     | holiday |        |
| 1                                                    | 95          | 89      | 184    |
|                                                      | 51.63       | 48.37   | 100.00 |
|                                                      | 78.51       | 83.96   | 81.06  |
| 2                                                    | 19          | 10      | 29     |
|                                                      | 65.52       | 34.48   | 100.00 |
|                                                      | 15.70       | 9.43    | 12.78  |
| 3                                                    | 6           | 7       | 13     |
|                                                      | 46.15       | 53.85   | 100.00 |
|                                                      | 4.96        | 6.60    | 5.73   |
| 4                                                    | 1           | 0       | 1      |
|                                                      | 100.00      | 0.00    | 100.00 |
|                                                      | 0.83        | 0.00    | 0.44   |
| Total                                                | 121         | 106     | 227    |
|                                                      | 53.30       | 46.70   | 100.00 |
|                                                      | 100.00      | 100.00  | 100.00 |

Fisher's exact = 0.358

| CASE           | score    | obs        | sum of ranks   |
|----------------|----------|------------|----------------|
| <b>regular</b> | <b>0</b> | <b>121</b> | <b>14115.5</b> |
| <b>holiday</b> | <b>1</b> | <b>106</b> | <b>11762.5</b> |

z = -0.95  
 Prob > |z| = 0.340

**\*upper\_gi & CASE**

|                          |
|--------------------------|
| Key                      |
| <i>frequency</i>         |
| <i>row percentage</i>    |
| <i>column percentage</i> |

Enumerating sample-space combinations:

- stage 5: enumerations = 1
- stage 4: enumerations = 3
- stage 3: enumerations = 15
- stage 2: enumerations = 90
- stage 1: enumerations = 0

| 6, Upper GI<br>(esophagus, stomach,<br>duodenum, biliary<br>and pancreatic<br>trees; do not | HolidayCase  |               | Total         |
|---------------------------------------------------------------------------------------------|--------------|---------------|---------------|
|                                                                                             | regular      | holiday       |               |
| 1                                                                                           | <b>98</b>    | <b>76</b>     | <b>174</b>    |
|                                                                                             | <b>56.32</b> | <b>43.68</b>  | <b>100.00</b> |
|                                                                                             | <b>80.99</b> | <b>71.70</b>  | <b>76.65</b>  |
| 2                                                                                           | <b>15</b>    | <b>16</b>     | <b>31</b>     |
|                                                                                             | <b>48.39</b> | <b>51.61</b>  | <b>100.00</b> |
|                                                                                             | <b>12.40</b> | <b>15.09</b>  | <b>13.66</b>  |
| 3                                                                                           | <b>7</b>     | <b>8</b>      | <b>15</b>     |
|                                                                                             | <b>46.67</b> | <b>53.33</b>  | <b>100.00</b> |
|                                                                                             | <b>5.79</b>  | <b>7.55</b>   | <b>6.61</b>   |
| 4                                                                                           | <b>0</b>     | <b>5</b>      | <b>5</b>      |
|                                                                                             | <b>0.00</b>  | <b>100.00</b> | <b>100.00</b> |



|       |        |        |        |
|-------|--------|--------|--------|
|       | 0.00   | 4.72   | 2.20   |
| 5     | 1      | 1      | 2      |
|       | 50.00  | 50.00  | 100.00 |
|       | 0.83   | 0.94   | 0.88   |
| Total | 121    | 106    | 227    |
|       | 53.30  | 46.70  | 100.00 |
|       | 100.00 | 100.00 | 100.00 |

Fisher's exact = 0.104

| CASE    | score | obs | sum of ranks |
|---------|-------|-----|--------------|
| regular | 0     | 121 | 13142.5      |
| holiday | 1     | 106 | 12735.5      |

z = 1.78  
 Prob > |z| = 0.074

\*lower\_gi & CASE

|                          |
|--------------------------|
| Key                      |
| <i>frequency</i>         |
| <i>row percentage</i>    |
| <i>column percentage</i> |

Enumerating sample-space combinations:

stage 4: enumerations = 1  
 stage 3: enumerations = 4  
 stage 2: enumerations = 31  
 stage 1: enumerations = 0

| 7. Lower GI<br>(intestines,<br>hernias) | HolidayCase |         | Total  |
|-----------------------------------------|-------------|---------|--------|
|                                         | regular     | holiday |        |
| 1                                       | 89          | 86      | 175    |
|                                         | 50.86       | 49.14   | 100.00 |
|                                         | 73.55       | 81.13   | 77.09  |
| 2                                       | 14          | 11      | 25     |
|                                         | 56.00       | 44.00   | 100.00 |
|                                         | 11.57       | 10.38   | 11.01  |

|       |                        |                        |                         |
|-------|------------------------|------------------------|-------------------------|
| 3     | 14<br>60.87<br>11.57   | 9<br>39.13<br>8.49     | 23<br>100.00<br>10.13   |
| 4     | 4<br>100.00<br>3.31    | 0<br>0.00<br>0.00      | 4<br>100.00<br>1.76     |
| Total | 121<br>53.30<br>100.00 | 106<br>46.70<br>100.00 | 227<br>100.00<br>100.00 |

Fisher's exact = 0.237

| CASE    | score | obs | sum of ranks |
|---------|-------|-----|--------------|
| regular | 0     | 121 | 14334        |
| holiday | 1     | 106 | 11544        |

z = -1.49  
 Prob > |z| = 0.136

**\*hepatic & CASE**

|                          |
|--------------------------|
| Key                      |
| <i>frequency</i>         |
| <i>row percentage</i>    |
| <i>column percentage</i> |

Enumerating sample-space combinations:

- stage 4: enumerations = 1
- stage 3: enumerations = 5
- stage 2: enumerations = 19
- stage 1: enumerations = 0

| 8. Hepatic<br>(liver only) | HolidayCase           |                      | Total                  |
|----------------------------|-----------------------|----------------------|------------------------|
|                            | regular               | holiday              |                        |
| 1                          | 106<br>54.92<br>87.60 | 87<br>45.08<br>82.08 | 193<br>100.00<br>85.02 |
| 2                          | 6<br>60.00<br>4.96    | 4<br>40.00<br>3.77   | 10<br>100.00<br>4.41   |

|       |        |        |        |
|-------|--------|--------|--------|
| 3     | 6      | 10     | 16     |
|       | 37.50  | 62.50  | 100.00 |
|       | 4.96   | 9.43   | 7.05   |
| 4     | 3      | 5      | 8      |
|       | 37.50  | 62.50  | 100.00 |
|       | 2.48   | 4.72   | 3.52   |
| Total | 121    | 106    | 227    |
|       | 53.30  | 46.70  | 100.00 |
|       | 100.00 | 100.00 | 100.00 |

Fisher's exact = 0.429

| CASE    | score | obs | sum of ranks |
|---------|-------|-----|--------------|
| regular | 0     | 121 | 13412.5      |
| holiday | 1     | 106 | 12465.5      |

z = 1.25  
 Prob > |z| = 0.213

**\*renal & CASE**

|                          |
|--------------------------|
| Key                      |
| <i>frequency</i>         |
| <i>row percentage</i>    |
| <i>column percentage</i> |

Enumerating sample-space combinations:

- stage 4: enumerations = 1
- stage 3: enumerations = 8
- stage 2: enumerations = 52
- stage 1: enumerations = 0

| 9. Renal<br>(kidneys<br>only) | HolidayCase |         | Total  |
|-------------------------------|-------------|---------|--------|
|                               | regular     | holiday |        |
| 1                             | 89          | 66      | 155    |
|                               | 57.42       | 42.58   | 100.00 |
|                               | 73.55       | 62.26   | 68.28  |
| 2                             | 8           | 13      | 21     |
|                               | 38.10       | 61.90   | 100.00 |
|                               | 6.61        | 12.26   | 9.25   |

|       |        |        |        |
|-------|--------|--------|--------|
| 3     | 17     | 17     | 34     |
|       | 50.00  | 50.00  | 100.00 |
|       | 14.05  | 16.04  | 14.98  |
| 4     | 7      | 10     | 17     |
|       | 41.18  | 58.82  | 100.00 |
|       | 5.79   | 9.43   | 7.49   |
| Total | 121    | 106    | 227    |
|       | 53.30  | 46.70  | 100.00 |
|       | 100.00 | 100.00 | 100.00 |

Fisher's exact = 0.249

| CASE    | score | obs | sum of ranks |
|---------|-------|-----|--------------|
| regular | 0     | 121 | 13092.5      |
| holiday | 1     | 106 | 12785.5      |

z = 1.73  
 Prob > |z| = 0.084

**\*other\_gu & CASE**

|                          |
|--------------------------|
| Key                      |
| <i>frequency</i>         |
| <i>row percentage</i>    |
| <i>column percentage</i> |

Enumerating sample-space combinations:

- stage 4: enumerations = 1
- stage 3: enumerations = 5
- stage 2: enumerations = 26
- stage 1: enumerations = 0

|                                                                                |             |         |        |
|--------------------------------------------------------------------------------|-------------|---------|--------|
| 10. Other<br>GU<br>(ureters,<br>bladder,<br>urethra,<br>prostate,<br>genitals) | HolidayCase |         | Total  |
|                                                                                | regular     | holiday |        |
| 1                                                                              | 91          | 90      | 181    |
|                                                                                | 50.28       | 49.72   | 100.00 |
|                                                                                | 75.21       | 84.91   | 79.74  |

|       |        |        |        |
|-------|--------|--------|--------|
| 2     | 14     | 7      | 21     |
|       | 66.67  | 33.33  | 100.00 |
|       | 11.57  | 6.60   | 9.25   |
| 3     | 12     | 7      | 19     |
|       | 63.16  | 36.84  | 100.00 |
|       | 9.92   | 6.60   | 8.37   |
| 4     | 4      | 2      | 6      |
|       | 66.67  | 33.33  | 100.00 |
|       | 3.31   | 1.89   | 2.64   |
| Total | 121    | 106    | 227    |
|       | 53.30  | 46.70  | 100.00 |
|       | 100.00 | 100.00 | 100.00 |

Fisher's exact = 0.357

| CASE           | score | obs | sum of ranks |
|----------------|-------|-----|--------------|
| <b>regular</b> | 0     | 121 | 14411        |
| <b>holiday</b> | 1     | 106 | 11467        |

z = -1.78  
 Prob > |z| = 0.075

\*musculo\_skeletal\_integum & CASE

|                          |
|--------------------------|
| Key                      |
| <i>frequency</i>         |
| <i>row percentage</i>    |
| <i>column percentage</i> |

Enumerating sample-space combinations:

- stage 5: enumerations = 1
- stage 4: enumerations = 2
- stage 3: enumerations = 8
- stage 2: enumerations = 47
- stage 1: enumerations = 0

| 11.<br>Musculo-skeletal-integumentary<br>(muscles, bone, skin) | HolidayCase            |                        | Total                   |
|----------------------------------------------------------------|------------------------|------------------------|-------------------------|
|                                                                | regular                | holiday                |                         |
| 1                                                              | 83<br>56.85<br>68.60   | 63<br>43.15<br>59.43   | 146<br>100.00<br>64.32  |
| 2                                                              | 13<br>41.94<br>10.74   | 18<br>58.06<br>16.98   | 31<br>100.00<br>13.66   |
| 3                                                              | 21<br>48.84<br>17.36   | 22<br>51.16<br>20.75   | 43<br>100.00<br>18.94   |
| 4                                                              | 3<br>50.00<br>2.48     | 3<br>50.00<br>2.83     | 6<br>100.00<br>2.64     |
| 5                                                              | 1<br>100.00<br>0.83    | 0<br>0.00<br>0.00      | 1<br>100.00<br>0.44     |
| Total                                                          | 121<br>53.30<br>100.00 | 106<br>46.70<br>100.00 | 227<br>100.00<br>100.00 |

Fisher's exact = 0.453

| CASE           | score | obs | sum of ranks |
|----------------|-------|-----|--------------|
| <b>regular</b> | 0     | 121 | 13283        |
| <b>holiday</b> | 1     | 106 | 12595        |

z = 1.22  
 Prob > |z| = 0.224

**\*neurological & CASE**

|                          |
|--------------------------|
| Key                      |
| <i>frequency</i>         |
| <i>row percentage</i>    |
| <i>column percentage</i> |

Enumerating sample-space combinations:

stage 5: enumerations = 1  
 stage 4: enumerations = 2  
 stage 3: enumerations = 7  
 stage 2: enumerations = 33  
 stage 1: enumerations = 0

| 12.<br>Neurologic<br>al (brain,<br>spinal<br>cord,<br>nerves; do<br>not<br>include<br>dementia) | HolidayCase            |                        | Total                   |
|-------------------------------------------------------------------------------------------------|------------------------|------------------------|-------------------------|
|                                                                                                 | regular                | holiday                |                         |
| 1                                                                                               | 87<br>55.06<br>71.90   | 71<br>44.94<br>66.98   | 158<br>100.00<br>69.60  |
| 2                                                                                               | 4<br>80.00<br>3.31     | 1<br>20.00<br>0.94     | 5<br>100.00<br>2.20     |
| 3                                                                                               | 22<br>43.14<br>18.18   | 29<br>56.86<br>27.36   | 51<br>100.00<br>22.47   |
| 4                                                                                               | 7<br>58.33<br>5.79     | 5<br>41.67<br>4.72     | 12<br>100.00<br>5.29    |
| 5                                                                                               | 1<br>100.00<br>0.83    | 0<br>0.00<br>0.00      | 1<br>100.00<br>0.44     |
| Total                                                                                           | 121<br>53.30<br>100.00 | 106<br>46.70<br>100.00 | 227<br>100.00<br>100.00 |

Fisher's exact = 0.304

| CASE           | score    | obs        | sum of ranks |
|----------------|----------|------------|--------------|
| <b>regular</b> | <b>0</b> | <b>121</b> | <b>13489</b> |
| <b>holiday</b> | <b>1</b> | <b>106</b> | <b>12389</b> |

z = 0.77  
 Prob > |z| = 0.444

**\*endocrine\_metabolic & CASE**

|                          |
|--------------------------|
| Key                      |
| <i>frequency</i>         |
| <i>row percentage</i>    |
| <i>column percentage</i> |

Enumerating sample-space combinations:

stage 5: enumerations = 1  
 stage 4: enumerations = 1  
 stage 3: enumerations = 5  
 stage 2: enumerations = 20  
 stage 1: enumerations = 0

| 13.<br>Endocrine-<br>Metabolic<br>(includes<br>diabetes,<br>diffuse<br>infections<br>,<br>infections<br>, toxi | HolidayCase          |                      | Total                 |
|----------------------------------------------------------------------------------------------------------------|----------------------|----------------------|-----------------------|
|                                                                                                                | regular              | holiday              |                       |
| 1                                                                                                              | 25<br>50.00<br>20.66 | 25<br>50.00<br>23.58 | 50<br>100.00<br>22.03 |
| 2                                                                                                              | 17<br>53.12<br>14.05 | 15<br>46.88<br>14.15 | 32<br>100.00<br>14.10 |
| 3                                                                                                              | 50<br>56.82<br>41.32 | 38<br>43.18<br>35.85 | 88<br>100.00<br>38.77 |
| 4                                                                                                              | 28<br>50.91          | 27<br>49.09          | 55<br>100.00          |



|       |        |        |        |
|-------|--------|--------|--------|
|       | 23.14  | 25.47  | 24.23  |
| 5     | 1      | 1      | 2      |
|       | 50.00  | 50.00  | 100.00 |
|       | 0.83   | 0.94   | 0.88   |
| Total | 121    | 106    | 227    |
|       | 53.30  | 46.70  | 100.00 |
|       | 100.00 | 100.00 | 100.00 |

Fisher's exact = 0.925

| CASE    | score | obs | sum of ranks |
|---------|-------|-----|--------------|
| regular | 0     | 121 | 13863.5      |
| holiday | 1     | 106 | 12014.5      |

z = -0.15  
 Prob > |z| = 0.883

**\*psychiatric\_behavioral & CASE**

|                          |
|--------------------------|
| Key                      |
| <i>frequency</i>         |
| <i>row percentage</i>    |
| <i>column percentage</i> |

Enumerating sample-space combinations:

- stage 4: enumerations = 1
- stage 3: enumerations = 3
- stage 2: enumerations = 10
- stage 1: enumerations = 0

|                                                                                       |             |         |        |
|---------------------------------------------------------------------------------------|-------------|---------|--------|
| 14.<br>Psychiatric/Behavioral<br>(includes depression, anxiety, agitation, psychosis, | HolidayCase |         |        |
|                                                                                       | regular     | holiday | Total  |
| 1                                                                                     | 84          | 67      | 151    |
|                                                                                       | 55.63       | 44.37   | 100.00 |
|                                                                                       | 69.42       | 63.21   | 66.52  |

|       |                        |                        |                         |
|-------|------------------------|------------------------|-------------------------|
| 2     | 11<br>47.83<br>9.09    | 12<br>52.17<br>11.32   | 23<br>100.00<br>10.13   |
| 3     | 21<br>50.00<br>17.36   | 21<br>50.00<br>19.81   | 42<br>100.00<br>18.50   |
| 4     | 5<br>45.45<br>4.13     | 6<br>54.55<br>5.66     | 11<br>100.00<br>4.85    |
| Total | 121<br>53.30<br>100.00 | 106<br>46.70<br>100.00 | 227<br>100.00<br>100.00 |

Fisher's exact = 0.784

| CASE    | score | obs | sum of ranks |
|---------|-------|-----|--------------|
| regular | 0     | 121 | 13392.5      |
| holiday | 1     | 106 | 12485.5      |

z = 0.97  
 Prob > |z| = 0.330

```

70 .
71 . local COM cardiac_comorb hypertension_comorb vascular_comorb ///
    >     respiratory_comorb eent_comorb upper_gi_comorb lower_gi_comorb ///
    >     hepatic_comorb renal_comorb musc_skel_integ_comorb other_gu_comorb ///
    >     neurological_comorb endocrine_metabolic_comorb

72 .
73 . foreach var of local COM {
    2.     di _newl "`var' & CASE"
    3.     di _newl
    4.     tab `var' CASE, r co ex
    5.     nptrend `var', by(CASE)
    6.     di _newl
    7.     }

*cardiac_comorb & CASE
    
```

|                          |
|--------------------------|
| Key                      |
| <i>frequency</i>         |
| <i>row percentage</i>    |
| <i>column percentage</i> |

| cardiac<br>comorb | HolidayCase |         | Total  |
|-------------------|-------------|---------|--------|
|                   | regular     | holiday |        |
| 0                 | 50          | 38      | 88     |
|                   | 56.82       | 43.18   | 100.00 |
|                   | 41.32       | 35.85   | 38.77  |
| 1                 | 71          | 68      | 139    |
|                   | 51.08       | 48.92   | 100.00 |
|                   | 58.68       | 64.15   | 61.23  |
| Total             | 121         | 106     | 227    |
|                   | 53.30       | 46.70   | 100.00 |
|                   | 100.00      | 100.00  | 100.00 |

Fisher's exact = 0.416  
 1-sided Fisher's exact = 0.240

| CASE           | score | obs | sum of ranks |
|----------------|-------|-----|--------------|
| <b>regular</b> | 0     | 121 | 13443        |
| <b>holiday</b> | 1     | 106 | 12435        |

z = 0.84  
 Prob > |z| = 0.399

**\*hypertension\_comorb & CASE**

|                          |
|--------------------------|
| Key                      |
| <i>frequency</i>         |
| <i>row percentage</i>    |
| <i>column percentage</i> |

| hypertensi<br>on comorb | HolidayCase |         | Total  |
|-------------------------|-------------|---------|--------|
|                         | regular     | holiday |        |
| 0                       | 86          | 73      | 159    |
|                         | 54.09       | 45.91   | 100.00 |
|                         | 71.07       | 68.87   | 70.04  |
| 1                       | 35          | 33      | 68     |
|                         | 51.47       | 48.53   | 100.00 |
|                         | 28.93       | 31.13   | 29.96  |
| Total                   | 121         | 106     | 227    |
|                         | 53.30       | 46.70   | 100.00 |
|                         | 100.00      | 100.00  | 100.00 |

Fisher's exact = 0.772  
 1-sided Fisher's exact = 0.414

| CASE           | score    | obs        | sum of ranks   |
|----------------|----------|------------|----------------|
| <b>regular</b> | <b>0</b> | <b>121</b> | <b>13652.5</b> |
| <b>holiday</b> | <b>1</b> | <b>106</b> | <b>12225.5</b> |

z = 0.36  
 Prob > |z| = 0.718

**\*vascular\_comorb & CASE**

|                          |
|--------------------------|
| Key                      |
| <i>frequency</i>         |
| <i>row percentage</i>    |
| <i>column percentage</i> |

| vascular<br>comorb | HolidayCase |         | Total  |
|--------------------|-------------|---------|--------|
|                    | regular     | holiday |        |
| 0                  | 71          | 67      | 138    |
|                    | 51.45       | 48.55   | 100.00 |
|                    | 58.68       | 63.21   | 60.79  |
| 1                  | 50          | 39      | 89     |
|                    | 56.18       | 43.82   | 100.00 |
|                    | 41.32       | 36.79   | 39.21  |
| Total              | 121         | 106     | 227    |
|                    | 53.30       | 46.70   | 100.00 |
|                    | 100.00      | 100.00  | 100.00 |

Fisher's exact = **0.499**  
 1-sided Fisher's exact = **0.288**

| CASE           | score    | obs        | sum of ranks   |
|----------------|----------|------------|----------------|
| <b>regular</b> | <b>0</b> | <b>121</b> | <b>14084.5</b> |
| <b>holiday</b> | <b>1</b> | <b>106</b> | <b>11793.5</b> |

z = **-0.70**  
 Prob > |z| = **0.486**

**\*respiratory\_comorb & CASE**

| Key                      |
|--------------------------|
| <i>frequency</i>         |
| <i>row percentage</i>    |
| <i>column percentage</i> |

| respirator<br>y comorb | HolidayCase   |               | Total         |
|------------------------|---------------|---------------|---------------|
|                        | regular       | holiday       |               |
| 0                      | <b>69</b>     | <b>56</b>     | <b>125</b>    |
|                        | <b>55.20</b>  | <b>44.80</b>  | <b>100.00</b> |
|                        | <b>57.02</b>  | <b>52.83</b>  | <b>55.07</b>  |
| 1                      | <b>52</b>     | <b>50</b>     | <b>102</b>    |
|                        | <b>50.98</b>  | <b>49.02</b>  | <b>100.00</b> |
|                        | <b>42.98</b>  | <b>47.17</b>  | <b>44.93</b>  |
| Total                  | <b>121</b>    | <b>106</b>    | <b>227</b>    |
|                        | <b>53.30</b>  | <b>46.70</b>  | <b>100.00</b> |
|                        | <b>100.00</b> | <b>100.00</b> | <b>100.00</b> |

Fisher's exact = **0.593**  
 1-sided Fisher's exact = **0.308**

| CASE           | score    | obs        | sum of ranks |
|----------------|----------|------------|--------------|
| <b>regular</b> | <b>0</b> | <b>121</b> | <b>13525</b> |
| <b>holiday</b> | <b>1</b> | <b>106</b> | <b>12353</b> |

z = **0.63**  
 Prob > |z| = **0.527**

**\*eent\_comorb & CASE**

|                          |
|--------------------------|
| Key                      |
| <i>frequency</i>         |
| <i>row percentage</i>    |
| <i>column percentage</i> |

| eent<br>comorb | HolidayCase |         | Total  |
|----------------|-------------|---------|--------|
|                | regular     | holiday |        |
| 0              | 114         | 99      | 213    |
|                | 53.52       | 46.48   | 100.00 |
|                | 94.21       | 93.40   | 93.83  |
| 1              | 7           | 7       | 14     |
|                | 50.00       | 50.00   | 100.00 |
|                | 5.79        | 6.60    | 6.17   |
| Total          | 121         | 106     | 227    |
|                | 53.30       | 46.70   | 100.00 |
|                | 100.00      | 100.00  | 100.00 |

Fisher's exact = 1.000  
 1-sided Fisher's exact = 0.506

| CASE           | score    | obs        | sum of ranks   |
|----------------|----------|------------|----------------|
| <b>regular</b> | <b>0</b> | <b>121</b> | <b>13741.5</b> |
| <b>holiday</b> | <b>1</b> | <b>106</b> | <b>12136.5</b> |

z = 0.26  
 Prob > |z| = 0.799

**\*upper\_gi\_comorb & CASE**

|                          |
|--------------------------|
| Key                      |
| <i>frequency</i>         |
| <i>row percentage</i>    |
| <i>column percentage</i> |

| upper gi<br>comorb | HolidayCase |         | Total  |
|--------------------|-------------|---------|--------|
|                    | regular     | holiday |        |
| 0                  | 113         | 92      | 205    |
|                    | 55.12       | 44.88   | 100.00 |
|                    | 93.39       | 86.79   | 90.31  |
| 1                  | 8           | 14      | 22     |
|                    | 36.36       | 63.64   | 100.00 |
|                    | 6.61        | 13.21   | 9.69   |
| Total              | 121         | 106     | 227    |
|                    | 53.30       | 46.70   | 100.00 |
|                    | 100.00      | 100.00  | 100.00 |

Fisher's exact = 0.117  
 1-sided Fisher's exact = 0.073

| CASE           | score    | obs        | sum of ranks |
|----------------|----------|------------|--------------|
| <b>regular</b> | <b>0</b> | <b>121</b> | <b>13371</b> |
| <b>holiday</b> | <b>1</b> | <b>106</b> | <b>12507</b> |

z = 1.67  
 Prob > |z| = 0.094

\*lower\_gi\_comorb & CASE

|                          |
|--------------------------|
| Key                      |
| <i>frequency</i>         |
| <i>row percentage</i>    |
| <i>column percentage</i> |

| lower gi<br>comorb | HolidayCase |         | Total  |
|--------------------|-------------|---------|--------|
|                    | regular     | holiday |        |
| 0                  | 103         | 97      | 200    |
|                    | 51.50       | 48.50   | 100.00 |
|                    | 85.12       | 91.51   | 88.11  |
| 1                  | 18          | 9       | 27     |
|                    | 66.67       | 33.33   | 100.00 |
|                    | 14.88       | 8.49    | 11.89  |
| Total              | 121         | 106     | 227    |
|                    | 53.30       | 46.70   | 100.00 |
|                    | 100.00      | 100.00  | 100.00 |

Fisher's exact = **0.155**  
 1-sided Fisher's exact = **0.100**

| CASE           | score    | obs        | sum of ranks   |
|----------------|----------|------------|----------------|
| <b>regular</b> | <b>0</b> | <b>121</b> | <b>14203.5</b> |
| <b>holiday</b> | <b>1</b> | <b>106</b> | <b>11674.5</b> |

z = **-1.48**  
 Prob > |z| = **0.139**

**\*hepatic\_comorb & CASE**

| Key                      |
|--------------------------|
| <i>frequency</i>         |
| <i>row percentage</i>    |
| <i>column percentage</i> |

| hepatic comorb | HolidayCase |         | Total  |
|----------------|-------------|---------|--------|
|                | regular     | holiday |        |
| 0              | 112         | 91      | 203    |
|                | 55.17       | 44.83   | 100.00 |
|                | 92.56       | 85.85   | 89.43  |
| 1              | 9           | 15      | 24     |
|                | 37.50       | 62.50   | 100.00 |
|                | 7.44        | 14.15   | 10.57  |
| Total          | 121         | 106     | 227    |
|                | 53.30       | 46.70   | 100.00 |
|                | 100.00      | 100.00  | 100.00 |

Fisher's exact = **0.130**  
 1-sided Fisher's exact = **0.077**

| CASE           | score    | obs        | sum of ranks   |
|----------------|----------|------------|----------------|
| <b>regular</b> | <b>0</b> | <b>121</b> | <b>13363.5</b> |
| <b>holiday</b> | <b>1</b> | <b>106</b> | <b>12514.5</b> |

z = **1.64**  
 Prob > |z| = **0.102**



**\*renal\_comorb & CASE**

|                          |
|--------------------------|
| Key                      |
| <i>frequency</i>         |
| <i>row percentage</i>    |
| <i>column percentage</i> |

| renal comorb | HolidayCase |         | Total  |
|--------------|-------------|---------|--------|
|              | regular     | holiday |        |
| 0            | 97          | 79      | 176    |
|              | 55.11       | 44.89   | 100.00 |
|              | 80.17       | 74.53   | 77.53  |
| 1            | 24          | 27      | 51     |
|              | 47.06       | 52.94   | 100.00 |
|              | 19.83       | 25.47   | 22.47  |
| Total        | 121         | 106     | 227    |
|              | 53.30       | 46.70   | 100.00 |
|              | 100.00      | 100.00  | 100.00 |

Fisher's exact = 0.341  
 1-sided Fisher's exact = 0.196

| CASE           | score    | obs        | sum of ranks   |
|----------------|----------|------------|----------------|
| <b>regular</b> | <b>0</b> | <b>121</b> | <b>13432.5</b> |
| <b>holiday</b> | <b>1</b> | <b>106</b> | <b>12445.5</b> |

z = 1.01  
 Prob > |z| = 0.311

**\*musc\_skel\_integ\_comorb & CASE**

|                          |
|--------------------------|
| Key                      |
| <i>frequency</i>         |
| <i>row percentage</i>    |
| <i>column percentage</i> |

| musc skel<br>integ<br>comorb | HolidayCase |         | Total  |
|------------------------------|-------------|---------|--------|
|                              | regular     | holiday |        |
| 0                            | 96          | 81      | 177    |
|                              | 54.24       | 45.76   | 100.00 |
|                              | 79.34       | 76.42   | 77.97  |
| 1                            | 25          | 25      | 50     |
|                              | 50.00       | 50.00   | 100.00 |
|                              | 20.66       | 23.58   | 22.03  |
| Total                        | 121         | 106     | 227    |
|                              | 53.30       | 46.70   | 100.00 |
|                              | 100.00      | 100.00  | 100.00 |

Fisher's exact = 0.632  
 1-sided Fisher's exact = 0.355

| CASE    | score | obs | sum of ranks |
|---------|-------|-----|--------------|
| regular | 0     | 121 | 13606.5      |
| holiday | 1     | 106 | 12271.5      |

z = 0.53  
 Prob > |z| = 0.597

\*other\_gu\_comorb & CASE

|                          |
|--------------------------|
| Key                      |
| <i>frequency</i>         |
| <i>row percentage</i>    |
| <i>column percentage</i> |

| other gu<br>comorb | HolidayCase |         | Total  |
|--------------------|-------------|---------|--------|
|                    | regular     | holiday |        |
| 0                  | 105         | 97      | 202    |
|                    | 51.98       | 48.02   | 100.00 |
|                    | 86.78       | 91.51   | 88.99  |
| 1                  | 16          | 9       | 25     |
|                    | 64.00       | 36.00   | 100.00 |
|                    | 13.22       | 8.49    | 11.01  |
| Total              | 121         | 106     | 227    |
|                    | 53.30       | 46.70   | 100.00 |

| 100.00 100.00 | 100.00

Fisher's exact = 0.293  
 1-sided Fisher's exact = 0.178

| CASE           | score    | obs        | sum of ranks   |
|----------------|----------|------------|----------------|
| <b>regular</b> | <b>0</b> | <b>121</b> | <b>14097.5</b> |
| <b>holiday</b> | <b>1</b> | <b>106</b> | <b>11780.5</b> |

z = -1.13  
 Prob > |z| = 0.257

**\*neurological\_comorb & CASE**

|                          |
|--------------------------|
| Key                      |
| <i>frequency</i>         |
| <i>row percentage</i>    |
| <i>column percentage</i> |

| neurologic<br>al comorb | HolidayCase |         | Total  |
|-------------------------|-------------|---------|--------|
|                         | regular     | holiday |        |
| 0                       | 91          | 72      | 163    |
|                         | 55.83       | 44.17   | 100.00 |
|                         | 75.21       | 67.92   | 71.81  |
| 1                       | 30          | 34      | 64     |
|                         | 46.88       | 53.12   | 100.00 |
|                         | 24.79       | 32.08   | 28.19  |
| Total                   | 121         | 106     | 227    |
|                         | 53.30       | 46.70   | 100.00 |
|                         | 100.00      | 100.00  | 100.00 |

Fisher's exact = 0.240  
 1-sided Fisher's exact = 0.143

| CASE           | score    | obs        | sum of ranks |
|----------------|----------|------------|--------------|
| <b>regular</b> | <b>0</b> | <b>121</b> | <b>13327</b> |
| <b>holiday</b> | <b>1</b> | <b>106</b> | <b>12551</b> |

z = 1.21  
 Prob > |z| = 0.225

**\*endocrine\_metabolic\_comorb & CASE**

|                          |
|--------------------------|
| Key                      |
| <i>frequency</i>         |
| <i>row percentage</i>    |
| <i>column percentage</i> |

| endocrine<br>metabolic<br>comorb | HolidayCase |         | Total  |
|----------------------------------|-------------|---------|--------|
|                                  | regular     | holiday |        |
| 0                                | 42          | 40      | 82     |
|                                  | 51.22       | 48.78   | 100.00 |
|                                  | 34.71       | 37.74   | 36.12  |
| 1                                | 79          | 66      | 145    |
|                                  | 54.48       | 45.52   | 100.00 |
|                                  | 65.29       | 62.26   | 63.88  |
| Total                            | 121         | 106     | 227    |
|                                  | 53.30       | 46.70   | 100.00 |
|                                  | 100.00      | 100.00  | 100.00 |

Fisher's exact = 0.679  
 1-sided Fisher's exact = 0.369

| CASE           | score | obs | sum of ranks |
|----------------|-------|-----|--------------|
| <b>regular</b> | 0     | 121 | 13988        |
| <b>holiday</b> | 1     | 106 | 11890        |

z = -0.47  
 Prob > |z| = 0.637

```
75 . display in smcl "{newpage}"
```

```

76 .
77 . *3) BASAL VISIT CCI
78 .
79 . local CCIC CCI_TOT

80 .
81 . foreach var of local CCIC      {
      2.      di _newl "`var' & CASE"
      3.      di _newl
      4.      tabstat `var', by(CASE) c(s) s(n mea sd min q max) f(%4.2f)
      5.      ttest `var', by(CASE)
      6.      //ranksum `var', by(CASE)
82 .      di _newl
      7.      }

```

\*CCI\_TOT & CASE

Summary for variables: CCI\_TOT  
by categories of: CASE (HolidayCase)

| CASE    | N      | mean  | sd   | min  | p25   | p50   | p75   |
|---------|--------|-------|------|------|-------|-------|-------|
| regular | 121.00 | 15.29 | 5.98 | 0.00 | 10.00 | 16.00 | 20.00 |
| holiday | 106.00 | 17.74 | 5.54 | 4.00 | 14.00 | 18.00 | 20.00 |
| Total   | 227.00 | 16.43 | 5.89 | 0.00 | 12.00 | 16.00 | 20.00 |

| CASE    | max   |
|---------|-------|
| regular | 30.00 |
| holiday | 34.00 |
| Total   | 34.00 |

Two-sample t test with equal variances

| Group    | Obs | Mean      | Std. Err. | Std. Dev. | [95% Conf. Interval] |           |
|----------|-----|-----------|-----------|-----------|----------------------|-----------|
| regular  | 121 | 15.28926  | .5433594  | 5.976953  | 14.21344             | 16.36507  |
| holiday  | 106 | 17.73585  | .5382581  | 5.541707  | 16.66858             | 18.80312  |
| combined | 227 | 16.43172  | .3911642  | 5.893484  | 15.66092             | 17.20251  |
| diff     |     | -2.446593 | .768668   |           | -3.961302            | -.9318838 |

diff = mean(**regular**) - mean(**holiday**) t = -3.1829  
Ho: diff = 0 degrees of freedom = 225

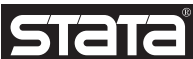

Ha: diff < 0  
Pr(T < t) = **0.0008**

Ha: diff != 0  
Pr(|T| > |t|) = **0.0017**

Ha: diff > 0  
Pr(T > t) = **0.9992**

```

83 .
84 .
85 . local CCI CCI_BIO CCI_SOC CCI_BEH CCI_ENV CCI_CUL

86 .
87 . foreach var of local CCI      {
    2.     di _newl "*`var' & CASE"
    3.     di _newl
    4.     tab `var' CASE, r co ex
    5.     di _newl
    6.     tabstat `var', by(CASE) c(s) s(n mea sd min q max) f(%4.2f)
    7.     //ttest `var', by(CASE)
88 .     ranksum `var', by(CASE)
    8.     di _newl
    9.     }

```

\*CCI\_BIO & CASE

|                          |
|--------------------------|
| Key                      |
| <i>frequency</i>         |
| <i>row percentage</i>    |
| <i>column percentage</i> |

Enumerating sample-space combinations:

```

stage 7: enumerations = 1
stage 6: enumerations = 7
stage 5: enumerations = 56
stage 4: enumerations = 214
stage 3: enumerations = 1218
stage 2: enumerations = 6966
stage 1: enumerations = 0

```

| CCI_BIO | HolidayCase            |                        | Total                   |
|---------|------------------------|------------------------|-------------------------|
|         | regular                | holiday                |                         |
| 0       | 6<br>100.00<br>4.96    | 0<br>0.00<br>0.00      | 6<br>100.00<br>2.64     |
| 2       | 9<br>52.94<br>7.44     | 8<br>47.06<br>7.55     | 17<br>100.00<br>7.49    |
| 4       | 13<br>54.17<br>10.74   | 11<br>45.83<br>10.38   | 24<br>100.00<br>10.57   |
| 6       | 23<br>60.53<br>19.01   | 15<br>39.47<br>14.15   | 38<br>100.00<br>16.74   |
| 8       | 31<br>52.54<br>25.62   | 28<br>47.46<br>26.42   | 59<br>100.00<br>25.99   |
| 10      | 31<br>46.97<br>25.62   | 35<br>53.03<br>33.02   | 66<br>100.00<br>29.07   |
| 12      | 8<br>47.06<br>6.61     | 9<br>52.94<br>8.49     | 17<br>100.00<br>7.49    |
| Total   | 121<br>53.30<br>100.00 | 106<br>46.70<br>100.00 | 227<br>100.00<br>100.00 |

Fisher's exact = 0.273

Summary for variables: CCI\_BIO  
by categories of: CASE (HolidayCase)

| CASE    | N      | mean | sd   | min  | p25  | p50  | p75   |
|---------|--------|------|------|------|------|------|-------|
| regular | 121.00 | 7.12 | 3.12 | 0.00 | 6.00 | 8.00 | 10.00 |
| holiday | 106.00 | 7.85 | 2.77 | 2.00 | 6.00 | 8.00 | 10.00 |
| Total   | 227.00 | 7.46 | 2.98 | 0.00 | 6.00 | 8.00 | 10.00 |



| CASE    | max          |
|---------|--------------|
| regular | <b>12.00</b> |
| holiday | <b>12.00</b> |
| Total   | <b>12.00</b> |

Two-sample Wilcoxon rank-sum (Mann-Whitney) test

| CASE     | obs        | rank sum       | expected     |
|----------|------------|----------------|--------------|
| regular  | <b>121</b> | <b>12966.5</b> | <b>13794</b> |
| holiday  | <b>106</b> | <b>12911.5</b> | <b>12084</b> |
| combined | <b>227</b> | <b>25878</b>   | <b>25878</b> |

unadjusted variance    **243694.00**  
 adjustment for ties    **-11904.34**  


---

 adjusted variance      **231789.66**

Ho: CCI\_BIO(CASE==regular) = CCI\_BIO(CASE==holiday)  
       z = **-1.719**  
       Prob > |z| = **0.0857**

**\*CCI\_SOC & CASE**

|                          |
|--------------------------|
| Key                      |
| <i>frequency</i>         |
| <i>row percentage</i>    |
| <i>column percentage</i> |

Enumerating sample-space combinations:  
 stage 5: enumerations = 1  
 stage 4: enumerations = 4  
 stage 3: enumerations = 37  
 stage 2: enumerations = 282  
 stage 1: enumerations = 0

| CCI_SOC | HolidayCase |         | Total  |
|---------|-------------|---------|--------|
|         | regular     | holiday |        |
| 0       | 17          | 8       | 25     |
|         | 68.00       | 32.00   | 100.00 |
|         | 14.05       | 7.55    | 11.01  |
| 2       | 45          | 31      | 76     |
|         | 59.21       | 40.79   | 100.00 |
|         | 37.19       | 29.25   | 33.48  |
| 4       | 45          | 48      | 93     |
|         | 48.39       | 51.61   | 100.00 |
|         | 37.19       | 45.28   | 40.97  |
| 6       | 13          | 17      | 30     |
|         | 43.33       | 56.67   | 100.00 |
|         | 10.74       | 16.04   | 13.22  |
| 8       | 1           | 2       | 3      |
|         | 33.33       | 66.67   | 100.00 |
|         | 0.83        | 1.89    | 1.32   |
| Total   | 121         | 106     | 227    |
|         | 53.30       | 46.70   | 100.00 |
|         | 100.00      | 100.00  | 100.00 |

Fisher's exact = 0.198

Summary for variables: CCI\_SOC  
by categories of: CASE (HolidayCase)

| CASE    | N      | mean | sd   | min  | p25  | p50  | p75  |
|---------|--------|------|------|------|------|------|------|
| regular | 121.00 | 2.94 | 1.79 | 0.00 | 2.00 | 2.00 | 4.00 |
| holiday | 106.00 | 3.51 | 1.76 | 0.00 | 2.00 | 4.00 | 4.00 |
| Total   | 227.00 | 3.21 | 1.80 | 0.00 | 2.00 | 4.00 | 4.00 |

| CASE    | max  |
|---------|------|
| regular | 8.00 |
| holiday | 8.00 |
| Total   | 8.00 |

Two-sample Wilcoxon rank-sum (Mann-Whitney) test

| CASE     | obs | rank sum | expected |
|----------|-----|----------|----------|
| regular  | 121 | 12688    | 13794    |
| holiday  | 106 | 13190    | 12084    |
| combined | 227 | 25878    | 25878    |

unadjusted variance    **243694.00**  
 adjustment for ties    **-26787.67**  


---

 adjusted variance        **216906.33**

Ho: CCI\_SOC(CASE==regular) = CCI\_SOC(CASE==holiday)  
       z = **-2.375**  
       Prob > |z| = **0.0176**

**\*CCI\_BEH & CASE**

|                          |
|--------------------------|
| Key                      |
| <i>frequency</i>         |
| <i>row percentage</i>    |
| <i>column percentage</i> |

Enumerating sample-space combinations:

stage 5: enumerations = 1  
 stage 4: enumerations = 5  
 stage 3: enumerations = 32  
 stage 2: enumerations = 365  
 stage 1: enumerations = 0

| CCI_BEH | HolidayCase |         | Total  |
|---------|-------------|---------|--------|
|         | regular     | holiday |        |
| 0       | 40          | 20      | 60     |
|         | 66.67       | 33.33   | 100.00 |
|         | 33.06       | 18.87   | 26.43  |
| 2       | 55          | 53      | 108    |
|         | 50.93       | 49.07   | 100.00 |
|         | 45.45       | 50.00   | 47.58  |
| 4       | 20          | 28      | 48     |
|         | 41.67       | 58.33   | 100.00 |
|         | 16.53       | 26.42   | 21.15  |
| 6       | 3           | 4       | 7      |

|       |        |        |        |
|-------|--------|--------|--------|
|       | 42.86  | 57.14  | 100.00 |
|       | 2.48   | 3.77   | 3.08   |
| 8     | 3      | 1      | 4      |
|       | 75.00  | 25.00  | 100.00 |
|       | 2.48   | 0.94   | 1.76   |
| Total | 121    | 106    | 227    |
|       | 53.30  | 46.70  | 100.00 |
|       | 100.00 | 100.00 | 100.00 |

Fisher's exact = 0.073

Summary for variables: CCI\_BEH  
by categories of: CASE (HolidayCase)

| CASE    | N      | mean | sd   | min  | p25  | p50  | p75  |
|---------|--------|------|------|------|------|------|------|
| regular | 121.00 | 1.92 | 1.81 | 0.00 | 0.00 | 2.00 | 2.00 |
| holiday | 106.00 | 2.36 | 1.63 | 0.00 | 2.00 | 2.00 | 4.00 |
| Total   | 227.00 | 2.12 | 1.74 | 0.00 | 0.00 | 2.00 | 4.00 |

| CASE    | max  |
|---------|------|
| regular | 8.00 |
| holiday | 8.00 |
| Total   | 8.00 |

Two-sample Wilcoxon rank-sum (Mann-Whitney) test

| CASE     | obs | rank sum | expected |
|----------|-----|----------|----------|
| regular  | 121 | 12704    | 13794    |
| holiday  | 106 | 13174    | 12084    |
| combined | 227 | 25878    | 25878    |

unadjusted variance 243694.00  
adjustment for ties -33053.04

adjusted variance 210640.96

Ho: CCI\_BEH(CASE==regular) = CCI\_BEH(CASE==holiday)  
z = -2.375  
Prob > |z| = 0.0176

**\*CCI\_ENV & CASE**

|                          |
|--------------------------|
| Key                      |
| <i>frequency</i>         |
| <i>row percentage</i>    |
| <i>column percentage</i> |

Enumerating sample-space combinations:

stage 4: enumerations = 1  
 stage 3: enumerations = 3  
 stage 2: enumerations = 18  
 stage 1: enumerations = 0

| CCI_ENV | HolidayCase |         | Total  |
|---------|-------------|---------|--------|
|         | regular     | holiday |        |
| 0       | 71          | 53      | 124    |
|         | 57.26       | 42.74   | 100.00 |
|         | 58.68       | 50.00   | 54.63  |
| 2       | 36          | 39      | 75     |
|         | 48.00       | 52.00   | 100.00 |
|         | 29.75       | 36.79   | 33.04  |
| 4       | 13          | 11      | 24     |
|         | 54.17       | 45.83   | 100.00 |
|         | 10.74       | 10.38   | 10.57  |
| 6       | 1           | 3       | 4      |
|         | 25.00       | 75.00   | 100.00 |
|         | 0.83        | 2.83    | 1.76   |
| Total   | 121         | 106     | 227    |
|         | 53.30       | 46.70   | 100.00 |
|         | 100.00      | 100.00  | 100.00 |

Fisher's exact = 0.424

Summary for variables: CCI\_ENV  
 by categories of: CASE (HolidayCase)

| CASE    | N      | mean | sd   | min  | p25  | p50  | p75  |
|---------|--------|------|------|------|------|------|------|
| regular | 121.00 | 1.07 | 1.44 | 0.00 | 0.00 | 0.00 | 2.00 |
| holiday | 106.00 | 1.32 | 1.56 | 0.00 | 0.00 | 1.00 | 2.00 |
| Total   | 227.00 | 1.19 | 1.50 | 0.00 | 0.00 | 0.00 | 2.00 |

| CASE    | max  |
|---------|------|
| regular | 6.00 |
| holiday | 6.00 |
| Total   | 6.00 |

Two-sample Wilcoxon rank-sum (Mann-Whitney) test

| CASE     | obs | rank sum | expected |
|----------|-----|----------|----------|
| regular  | 121 | 13244.5  | 13794    |
| holiday  | 106 | 12633.5  | 12084    |
| combined | 227 | 25878    | 25878    |

unadjusted variance    243694.00  
 adjustment for ties    -48796.90  


---

 adjusted variance    194897.10

Ho: CCI\_ENV(CASE==regular) = CCI\_ENV(CASE==holiday)  
       z = -1.245  
       Prob > |z| = 0.2132

\*CCI\_CUL & CASE

|                                                                       |
|-----------------------------------------------------------------------|
| Key                                                                   |
| <i>frequency</i><br><i>row percentage</i><br><i>column percentage</i> |

Enumerating sample-space combinations:

stage 5: enumerations = 1  
 stage 4: enumerations = 7  
 stage 3: enumerations = 53  
 stage 2: enumerations = 561  
 stage 1: enumerations = 0

| CCI_CUL | HolidayCase |         | Total  |
|---------|-------------|---------|--------|
|         | regular     | holiday |        |
| 0       | 36          | 21      | 57     |
|         | 63.16       | 36.84   | 100.00 |
|         | 29.75       | 19.81   | 25.11  |
| 2       | 46          | 44      | 90     |
|         | 51.11       | 48.89   | 100.00 |
|         | 38.02       | 41.51   | 39.65  |
| 4       | 29          | 30      | 59     |
|         | 49.15       | 50.85   | 100.00 |
|         | 23.97       | 28.30   | 25.99  |
| 6       | 9           | 5       | 14     |
|         | 64.29       | 35.71   | 100.00 |
|         | 7.44        | 4.72    | 6.17   |
| 8       | 1           | 6       | 7      |
|         | 14.29       | 85.71   | 100.00 |
|         | 0.83        | 5.66    | 3.08   |
| Total   | 121         | 106     | 227    |
|         | 53.30       | 46.70   | 100.00 |
|         | 100.00      | 100.00  | 100.00 |

Fisher's exact = 0.105

Summary for variables: CCI\_CUL  
 by categories of: CASE (HolidayCase)

| CASE    | N      | mean | sd   | min  | p25  | p50  | p75  |
|---------|--------|------|------|------|------|------|------|
| regular | 121.00 | 2.23 | 1.90 | 0.00 | 0.00 | 2.00 | 4.00 |
| holiday | 106.00 | 2.70 | 2.07 | 0.00 | 2.00 | 2.00 | 4.00 |
| Total   | 227.00 | 2.45 | 1.99 | 0.00 | 0.00 | 2.00 | 4.00 |

| CASE    | max         |
|---------|-------------|
| regular | <b>8.00</b> |
| holiday | <b>8.00</b> |
| Total   | <b>8.00</b> |

Two-sample Wilcoxon rank-sum (Mann-Whitney) test

| CASE     | obs        | rank sum       | expected     |
|----------|------------|----------------|--------------|
| regular  | <b>121</b> | <b>13037.5</b> | <b>13794</b> |
| holiday  | <b>106</b> | <b>12840.5</b> | <b>12084</b> |
| combined | <b>227</b> | <b>25878</b>   | <b>25878</b> |

unadjusted variance    **243694.00**  
 adjustment for ties    **-23384.91**  


---

 adjusted variance        **220309.09**

Ho: CCI\_CUL(CASE==regular) = CCI\_CUL(CASE==holiday)  
       z = **-1.612**  
       Prob > |z| = **0.1070**

```
89 .
90 .
91 . local CCI8 CCI_BIO CCI_SOC CCI_BEH CCI_ENV CCI_CUL
92 .
93 . foreach var of local CCI8      {
    2.     di _newl "*`var' (dichotomized at median) & CASE"
    3.     di _newl
    4.     tab M_`var' CASE, r co ex
    5.     di _newl
    6.     }

*CCI_BIO (dichotomized at median) & CASE
```

|                          |
|--------------------------|
| Key                      |
| <i>frequency</i>         |
| <i>row percentage</i>    |
| <i>column percentage</i> |



| 2<br>quantiles<br>of CCI_BIO | HolidayCase |         | Total  |
|------------------------------|-------------|---------|--------|
|                              | regular     | holiday |        |
| 1                            | 82          | 62      | 144    |
|                              | 56.94       | 43.06   | 100.00 |
|                              | 67.77       | 58.49   | 63.44  |
| 2                            | 39          | 44      | 83     |
|                              | 46.99       | 53.01   | 100.00 |
|                              | 32.23       | 41.51   | 36.56  |
| Total                        | 121         | 106     | 227    |
|                              | 53.30       | 46.70   | 100.00 |
|                              | 100.00      | 100.00  | 100.00 |

Fisher's exact = 0.168  
 1-sided Fisher's exact = 0.095

\*CCI\_SOC (dichotomized at median) & CASE

|                          |
|--------------------------|
| Key                      |
| <i>frequency</i>         |
| <i>row percentage</i>    |
| <i>column percentage</i> |

| 2<br>quantiles<br>of CCI_SOC | HolidayCase |         | Total  |
|------------------------------|-------------|---------|--------|
|                              | regular     | holiday |        |
| 1                            | 107         | 87      | 194    |
|                              | 55.15       | 44.85   | 100.00 |
|                              | 88.43       | 82.08   | 85.46  |
| 2                            | 14          | 19      | 33     |
|                              | 42.42       | 57.58   | 100.00 |
|                              | 11.57       | 17.92   | 14.54  |
| Total                        | 121         | 106     | 227    |
|                              | 53.30       | 46.70   | 100.00 |
|                              | 100.00      | 100.00  | 100.00 |

Fisher's exact = 0.191  
 1-sided Fisher's exact = 0.122

**\*CCI\_BEH (dichotomized at median) & CASE**

|                          |
|--------------------------|
| Key                      |
| <i>frequency</i>         |
| <i>row percentage</i>    |
| <i>column percentage</i> |

| 2<br>quantiles<br>of CCI_BEH | HolidayCase |         | Total  |
|------------------------------|-------------|---------|--------|
|                              | regular     | holiday |        |
| 1                            | 95          | 73      | 168    |
|                              | 56.55       | 43.45   | 100.00 |
|                              | 78.51       | 68.87   | 74.01  |
| 2                            | 26          | 33      | 59     |
|                              | 44.07       | 55.93   | 100.00 |
|                              | 21.49       | 31.13   | 25.99  |
| Total                        | 121         | 106     | 227    |
|                              | 53.30       | 46.70   | 100.00 |
|                              | 100.00      | 100.00  | 100.00 |

Fisher's exact = 0.129  
 1-sided Fisher's exact = 0.067

**\*CCI\_ENV (dichotomized at median) & CASE**

|                          |
|--------------------------|
| Key                      |
| <i>frequency</i>         |
| <i>row percentage</i>    |
| <i>column percentage</i> |

| 2<br>quantiles<br>of CCI_ENV | HolidayCase |         | Total  |
|------------------------------|-------------|---------|--------|
|                              | regular     | holiday |        |
| 1                            | 71          | 53      | 124    |
|                              | 57.26       | 42.74   | 100.00 |
|                              | 58.68       | 50.00   | 54.63  |
| 2                            | 50          | 53      | 103    |
|                              | 48.54       | 51.46   | 100.00 |
|                              | 41.32       | 50.00   | 45.37  |
| Total                        | 121         | 106     | 227    |
|                              | 53.30       | 46.70   | 100.00 |
|                              | 100.00      | 100.00  | 100.00 |

Fisher's exact = 0.229  
 1-sided Fisher's exact = 0.120

\*CCI\_CUL (dichotomized at median) & CASE

|                          |
|--------------------------|
| Key                      |
| <i>frequency</i>         |
| <i>row percentage</i>    |
| <i>column percentage</i> |

| 2<br>quantiles<br>of CCI_CUL | HolidayCase |         | Total  |
|------------------------------|-------------|---------|--------|
|                              | regular     | holiday |        |
| 1                            | 82          | 65      | 147    |
|                              | 55.78       | 44.22   | 100.00 |
|                              | 67.77       | 61.32   | 64.76  |
| 2                            | 39          | 41      | 80     |
|                              | 48.75       | 51.25   | 100.00 |
|                              | 32.23       | 38.68   | 35.24  |
| Total                        | 121         | 106     | 227    |
|                              | 53.30       | 46.70   | 100.00 |
|                              | 100.00      | 100.00  | 100.00 |

Fisher's exact = 0.332  
 1-sided Fisher's exact = 0.191

```
94 .  
95 . display in smcl "{newpage}"
```

```

96 .
97 . *3.1) BASAL VISIT CCI SINGLE ITEMS
98 .
99 . global BIO age_75_years intake_5_medications cirs_3_or_cirs_severity_3 ///
>     complete_med_history_form edmonton_frail_scale_5 barthel_index_60

100 .
101 .
102 . global SOC living_alone income_1000_month unemploym_precar_work ///
>     depend_disab_family_memb need_for_a_caregiver

103 .
104 . global BEH inadeq_adher_to_medicat ///
>     smoking_at_least_4_cig_day alcohol_or_drug_abuse inappropriate_diet ///
>     short_blessed_test_9

105 .
106 . global ENV institutionalization difficult_access_to_health ///
>     home_architect_barriers occupat_expos_to_toxics air_pollution

107 .
108 . global CUL schooling_8_years insuff_access_to_info ///
>     lack_adher_screen_programs language_barriers perceived_discrimination

109 .
110 .
111 . foreach glo in global BIO SOC BEH ENV CUL      {
2.     display as text "{hline 79}"
3.     foreach var of global `glo'      {
4.         di _newl "*`glo': `var' & CASE"
5.         di _newl
6.         tab `var' CASE, r co ex
7.         di _newl
8.         di _newl
9.     }
10. }

```

---



---

\*BIO: age\_75\_years & CASE

|                          |
|--------------------------|
| Key                      |
| <i>frequency</i>         |
| <i>row percentage</i>    |
| <i>column percentage</i> |

| Age >= 75<br>years | HolidayCase |         | Total  |
|--------------------|-------------|---------|--------|
|                    | regular     | holiday |        |
| No                 | 42          | 23      | 65     |
|                    | 64.62       | 35.38   | 100.00 |
|                    | 34.71       | 21.70   | 28.63  |
| Yes                | 79          | 83      | 162    |
|                    | 48.77       | 51.23   | 100.00 |
|                    | 65.29       | 78.30   | 71.37  |
| Total              | 121         | 106     | 227    |
|                    | 53.30       | 46.70   | 100.00 |
|                    | 100.00      | 100.00  | 100.00 |

Fisher's exact = 0.039  
 1-sided Fisher's exact = 0.021

**\*BIO: intake\_5\_medications & CASE**

|                          |
|--------------------------|
| Key                      |
| <i>frequency</i>         |
| <i>row percentage</i>    |
| <i>column percentage</i> |

| Intake >= 5<br>medications | HolidayCase |         | Total  |
|----------------------------|-------------|---------|--------|
|                            | regular     | holiday |        |
| No                         | 38          | 24      | 62     |
|                            | 61.29       | 38.71   | 100.00 |
|                            | 31.40       | 22.64   | 27.31  |
| Yes                        | 83          | 82      | 165    |
|                            | 50.30       | 49.70   | 100.00 |
|                            | 68.60       | 77.36   | 72.69  |
| Total                      | 121         | 106     | 227    |
|                            | 53.30       | 46.70   | 100.00 |
|                            | 100.00      | 100.00  | 100.00 |

Fisher's exact = 0.179  
 1-sided Fisher's exact = 0.092

**\*BIO: cirs\_3\_or\_cirs\_severity\_3 & CASE**

|                          |
|--------------------------|
| Key                      |
| <i>frequency</i>         |
| <i>row percentage</i>    |
| <i>column percentage</i> |

| CIRS > 3<br>and/or<br>CIRS<br>severity ><br>3 | HolidayCase |         | Total  |
|-----------------------------------------------|-------------|---------|--------|
|                                               | regular     | holiday |        |
| No                                            | 63          | 49      | 112    |
|                                               | 56.25       | 43.75   | 100.00 |
|                                               | 52.07       | 46.67   | 49.56  |
| Yes                                           | 58          | 56      | 114    |
|                                               | 50.88       | 49.12   | 100.00 |
|                                               | 47.93       | 53.33   | 50.44  |
| Total                                         | 121         | 105     | 226    |
|                                               | 53.54       | 46.46   | 100.00 |
|                                               | 100.00      | 100.00  | 100.00 |

Fisher's exact = 0.427  
 1-sided Fisher's exact = 0.249

**\*BIO: complete\_med\_history\_form & CASE**

|                          |
|--------------------------|
| Key                      |
| <i>frequency</i>         |
| <i>row percentage</i>    |
| <i>column percentage</i> |

| Complete<br>MEDICAL<br>HISTORY<br>FORM | HolidayCase |         | Total  |
|----------------------------------------|-------------|---------|--------|
|                                        | regular     | holiday |        |
| No                                     | 7           | 4       | 11     |
|                                        | 63.64       | 36.36   | 100.00 |
|                                        | 5.83        | 4.35    | 5.19   |
| Yes                                    | 113         | 88      | 201    |
|                                        | 56.22       | 43.78   | 100.00 |
|                                        | 94.17       | 95.65   | 94.81  |
| Total                                  | 120         | 92      | 212    |
|                                        | 56.60       | 43.40   | 100.00 |
|                                        | 100.00      | 100.00  | 100.00 |

Fisher's exact = 0.760  
 1-sided Fisher's exact = 0.438

\*BIO: edmonton\_frail\_scale\_5 & CASE

|                          |
|--------------------------|
| Key                      |
| <i>frequency</i>         |
| <i>row percentage</i>    |
| <i>column percentage</i> |



| Edmonton<br>Frail<br>Scale > 5 | HolidayCase |         | Total  |
|--------------------------------|-------------|---------|--------|
|                                | regular     | holiday |        |
| No                             | 42          | 19      | 61     |
|                                | 68.85       | 31.15   | 100.00 |
|                                | 34.71       | 17.92   | 26.87  |
| Yes                            | 79          | 87      | 166    |
|                                | 47.59       | 52.41   | 100.00 |
|                                | 65.29       | 82.08   | 73.13  |
| Total                          | 121         | 106     | 227    |
|                                | 53.30       | 46.70   | 100.00 |
|                                | 100.00      | 100.00  | 100.00 |

Fisher's exact = 0.005  
 1-sided Fisher's exact = 0.003

\*BIO: barthel\_index\_60 & CASE

|                          |
|--------------------------|
| Key                      |
| <i>frequency</i>         |
| <i>row percentage</i>    |
| <i>column percentage</i> |

| Barthel<br>Index < 60 | HolidayCase |         | Total  |
|-----------------------|-------------|---------|--------|
|                       | regular     | holiday |        |
| No                    | 102         | 86      | 188    |
|                       | 54.26       | 45.74   | 100.00 |
|                       | 84.30       | 81.13   | 82.82  |
| Yes                   | 19          | 20      | 39     |
|                       | 48.72       | 51.28   | 100.00 |
|                       | 15.70       | 18.87   | 17.18  |
| Total                 | 121         | 106     | 227    |
|                       | 53.30       | 46.70   | 100.00 |
|                       | 100.00      | 100.00  | 100.00 |

Fisher's exact = 0.598  
 1-sided Fisher's exact = 0.324

\*SOC: living\_alone & CASE

|                          |
|--------------------------|
| Key                      |
| <i>frequency</i>         |
| <i>row percentage</i>    |
| <i>column percentage</i> |

| Living alone | HolidayCase |         | Total  |
|--------------|-------------|---------|--------|
|              | regular     | holiday |        |
| No           | 87          | 81      | 168    |
|              | 51.79       | 48.21   | 100.00 |
|              | 71.90       | 76.42   | 74.01  |
| Yes          | 34          | 25      | 59     |
|              | 57.63       | 42.37   | 100.00 |
|              | 28.10       | 23.58   | 25.99  |
| Total        | 121         | 106     | 227    |
|              | 53.30       | 46.70   | 100.00 |
|              | 100.00      | 100.00  | 100.00 |

Fisher's exact = 0.453  
 1-sided Fisher's exact = 0.267

\*SOC: income\_1000\_month & CASE

|                          |
|--------------------------|
| Key                      |
| <i>frequency</i>         |
| <i>row percentage</i>    |
| <i>column percentage</i> |

| Income <<br>1000€/month | HolidayCase |         | Total  |
|-------------------------|-------------|---------|--------|
|                         | regular     | holiday |        |
| No                      | 64          | 38      | 102    |
|                         | 62.75       | 37.25   | 100.00 |
|                         | 52.89       | 35.85   | 44.93  |
| Yes                     | 57          | 68      | 125    |
|                         | 45.60       | 54.40   | 100.00 |
|                         | 47.11       | 64.15   | 55.07  |
| Total                   | 121         | 106     | 227    |
|                         | 53.30       | 46.70   | 100.00 |
|                         | 100.00      | 100.00  | 100.00 |

Fisher's exact = 0.011  
 1-sided Fisher's exact = 0.007

**\*SOC: unemploym\_precar\_work & CASE**

|                          |
|--------------------------|
| Key                      |
| <i>frequency</i>         |
| <i>row percentage</i>    |
| <i>column percentage</i> |

| Unemployment/precari-ous work | HolidayCase |         | Total  |
|-------------------------------|-------------|---------|--------|
|                               | regular     | holiday |        |
| No                            | 111         | 98      | 209    |
|                               | 53.11       | 46.89   | 100.00 |
|                               | 91.74       | 92.45   | 92.07  |
| Yes                           | 10          | 8       | 18     |
|                               | 55.56       | 44.44   | 100.00 |
|                               | 8.26        | 7.55    | 7.93   |
| Total                         | 121         | 106     | 227    |
|                               | 53.30       | 46.70   | 100.00 |
|                               | 100.00      | 100.00  | 100.00 |

Fisher's exact = **1.000**  
 1-sided Fisher's exact = **0.520**

**\*SOC: depend\_disab\_family\_memb & CASE**

|                          |
|--------------------------|
| Key                      |
| <i>frequency</i>         |
| <i>row percentage</i>    |
| <i>column percentage</i> |

| Dependent/<br>disabled<br>family<br>member | HolidayCase   |               | Total         |
|--------------------------------------------|---------------|---------------|---------------|
|                                            | regular       | holiday       |               |
| No                                         | <b>109</b>    | <b>96</b>     | <b>205</b>    |
|                                            | <b>53.17</b>  | <b>46.83</b>  | <b>100.00</b> |
|                                            | <b>90.08</b>  | <b>90.57</b>  | <b>90.31</b>  |
| Yes                                        | <b>12</b>     | <b>10</b>     | <b>22</b>     |
|                                            | <b>54.55</b>  | <b>45.45</b>  | <b>100.00</b> |
|                                            | <b>9.92</b>   | <b>9.43</b>   | <b>9.69</b>   |
| Total                                      | <b>121</b>    | <b>106</b>    | <b>227</b>    |
|                                            | <b>53.30</b>  | <b>46.70</b>  | <b>100.00</b> |
|                                            | <b>100.00</b> | <b>100.00</b> | <b>100.00</b> |

Fisher's exact = **1.000**  
 1-sided Fisher's exact = **0.542**

**\*SOC: need\_for\_a\_caregiver & CASE**

|                          |
|--------------------------|
| Key                      |
| <i>frequency</i>         |
| <i>row percentage</i>    |
| <i>column percentage</i> |

| Need for a caregiver | HolidayCase |         | Total  |
|----------------------|-------------|---------|--------|
|                      | regular     | holiday |        |
| No                   | 56          | 31      | 87     |
|                      | 64.37       | 35.63   | 100.00 |
|                      | 46.28       | 29.25   | 38.33  |
| Yes                  | 65          | 75      | 140    |
|                      | 46.43       | 53.57   | 100.00 |
|                      | 53.72       | 70.75   | 61.67  |
| Total                | 121         | 106     | 227    |
|                      | 53.30       | 46.70   | 100.00 |
|                      | 100.00      | 100.00  | 100.00 |

Fisher's exact = 0.010  
 1-sided Fisher's exact = 0.006

\*BEH: inadeq\_adher\_to\_medicat & CASE

|                          |
|--------------------------|
| Key                      |
| <i>frequency</i>         |
| <i>row percentage</i>    |
| <i>column percentage</i> |

| Inadequate adherence to medications | HolidayCase |         | Total  |
|-------------------------------------|-------------|---------|--------|
|                                     | regular     | holiday |        |
| No                                  | 100         | 88      | 188    |
|                                     | 53.19       | 46.81   | 100.00 |
|                                     | 82.64       | 83.81   | 83.19  |
| Yes                                 | 21          | 17      | 38     |
|                                     | 55.26       | 44.74   | 100.00 |
|                                     | 17.36       | 16.19   | 16.81  |
| Total                               | 121         | 105     | 226    |
|                                     | 53.54       | 46.46   | 100.00 |
|                                     | 100.00      | 100.00  | 100.00 |

Fisher's exact = 0.860  
 1-sided Fisher's exact = 0.479

\*BEH: smoking\_at\_least\_4\_cig\_day & CASE

|                          |
|--------------------------|
| Key                      |
| <i>frequency</i>         |
| <i>row percentage</i>    |
| <i>column percentage</i> |

| Active smoking of at least 4 cigarettes /day | HolidayCase |         | Total  |
|----------------------------------------------|-------------|---------|--------|
|                                              | regular     | holiday |        |
| No                                           | 103         | 93      | 196    |
|                                              | 52.55       | 47.45   | 100.00 |
|                                              | 85.12       | 88.57   | 86.73  |
| Yes                                          | 18          | 12      | 30     |
|                                              | 60.00       | 40.00   | 100.00 |
|                                              | 14.88       | 11.43   | 13.27  |
| Total                                        | 121         | 105     | 226    |
|                                              | 53.54       | 46.46   | 100.00 |

| 100.00 100.00 | 100.00

Fisher's exact = 0.556  
 1-sided Fisher's exact = 0.287

**\*BEH: alcohol\_or\_drug\_abuse & CASE**

|                          |
|--------------------------|
| Key                      |
| <i>frequency</i>         |
| <i>row percentage</i>    |
| <i>column percentage</i> |

| Alcohol<br>(>3 Unit<br>Alcoholic/<br>day)<br>and/or<br>drug abuse<br>(current<br>or past) | HolidayCase |         | Total  |
|-------------------------------------------------------------------------------------------|-------------|---------|--------|
|                                                                                           | regular     | holiday |        |
| No                                                                                        | 115         | 98      | 213    |
|                                                                                           | 53.99       | 46.01   | 100.00 |
|                                                                                           | 95.04       | 93.33   | 94.25  |
| Yes                                                                                       | 6           | 7       | 13     |
|                                                                                           | 46.15       | 53.85   | 100.00 |
|                                                                                           | 4.96        | 6.67    | 5.75   |
| Total                                                                                     | 121         | 105     | 226    |
|                                                                                           | 53.54       | 46.46   | 100.00 |
|                                                                                           | 100.00      | 100.00  | 100.00 |

Fisher's exact = 0.776  
 1-sided Fisher's exact = 0.394

**\*BEH: inappropriate\_diet & CASE**

|                          |
|--------------------------|
| Key                      |
| <i>frequency</i>         |
| <i>row percentage</i>    |
| <i>column percentage</i> |

| Inappropriate diet | HolidayCase   |               | Total         |
|--------------------|---------------|---------------|---------------|
|                    | regular       | holiday       |               |
| No                 | <b>106</b>    | <b>79</b>     | <b>185</b>    |
|                    | <b>57.30</b>  | <b>42.70</b>  | <b>100.00</b> |
|                    | <b>87.60</b>  | <b>75.24</b>  | <b>81.86</b>  |
| Yes                | <b>15</b>     | <b>26</b>     | <b>41</b>     |
|                    | <b>36.59</b>  | <b>63.41</b>  | <b>100.00</b> |
|                    | <b>12.40</b>  | <b>24.76</b>  | <b>18.14</b>  |
| Total              | <b>121</b>    | <b>105</b>    | <b>226</b>    |
|                    | <b>53.54</b>  | <b>46.46</b>  | <b>100.00</b> |
|                    | <b>100.00</b> | <b>100.00</b> | <b>100.00</b> |

Fisher's exact = **0.024**  
 1-sided Fisher's exact = **0.013**

**\*BEH: short\_blessed\_test\_9 & CASE**

|                          |
|--------------------------|
| Key                      |
| <i>frequency</i>         |
| <i>row percentage</i>    |
| <i>column percentage</i> |



| Short Blessed Test > 9 | HolidayCase |         | Total  |
|------------------------|-------------|---------|--------|
|                        | regular     | holiday |        |
| No                     | 65          | 42      | 107    |
|                        | 60.75       | 39.25   | 100.00 |
|                        | 53.72       | 40.00   | 47.35  |
| Yes                    | 56          | 63      | 119    |
|                        | 47.06       | 52.94   | 100.00 |
|                        | 46.28       | 60.00   | 52.65  |
| Total                  | 121         | 105     | 226    |
|                        | 53.54       | 46.46   | 100.00 |
|                        | 100.00      | 100.00  | 100.00 |

Fisher's exact = 0.046  
 1-sided Fisher's exact = 0.027

\*ENV: institutionalization & CASE

|                          |
|--------------------------|
| Key                      |
| <i>frequency</i>         |
| <i>row percentage</i>    |
| <i>column percentage</i> |

| Institutionalization | HolidayCase |         | Total  |
|----------------------|-------------|---------|--------|
|                      | regular     | holiday |        |
| No                   | 116         | 98      | 214    |
|                      | 54.21       | 45.79   | 100.00 |
|                      | 95.87       | 92.45   | 94.27  |
| Yes                  | 5           | 8       | 13     |
|                      | 38.46       | 61.54   | 100.00 |
|                      | 4.13        | 7.55    | 5.73   |
| Total                | 121         | 106     | 227    |
|                      | 53.30       | 46.70   | 100.00 |
|                      | 100.00      | 100.00  | 100.00 |

Fisher's exact = **0.392**  
 1-sided Fisher's exact = **0.207**

**\*ENV: difficult\_access\_to\_health & CASE**

|                          |
|--------------------------|
| Key                      |
| <i>frequency</i>         |
| <i>row percentage</i>    |
| <i>column percentage</i> |

| Difficult<br>access to<br>healthcare | HolidayCase   |               | Total         |
|--------------------------------------|---------------|---------------|---------------|
|                                      | regular       | holiday       |               |
| No                                   | <b>107</b>    | <b>94</b>     | <b>201</b>    |
|                                      | <b>53.23</b>  | <b>46.77</b>  | <b>100.00</b> |
|                                      | <b>88.43</b>  | <b>88.68</b>  | <b>88.55</b>  |
| Yes                                  | <b>14</b>     | <b>12</b>     | <b>26</b>     |
|                                      | <b>53.85</b>  | <b>46.15</b>  | <b>100.00</b> |
|                                      | <b>11.57</b>  | <b>11.32</b>  | <b>11.45</b>  |
| Total                                | <b>121</b>    | <b>106</b>    | <b>227</b>    |
|                                      | <b>53.30</b>  | <b>46.70</b>  | <b>100.00</b> |
|                                      | <b>100.00</b> | <b>100.00</b> | <b>100.00</b> |

Fisher's exact = **1.000**  
 1-sided Fisher's exact = **0.561**

**\*ENV: home\_architect\_barriers & CASE**

|                          |
|--------------------------|
| Key                      |
| <i>frequency</i>         |
| <i>row percentage</i>    |
| <i>column percentage</i> |

| Presence<br>of home<br>architectu<br>ral<br>barriers | HolidayCase   |               | Total         |
|------------------------------------------------------|---------------|---------------|---------------|
|                                                      | regular       | holiday       |               |
| No                                                   | <b>106</b>    | <b>82</b>     | <b>188</b>    |
|                                                      | <b>56.38</b>  | <b>43.62</b>  | <b>100.00</b> |
|                                                      | <b>87.60</b>  | <b>77.36</b>  | <b>82.82</b>  |
| Yes                                                  | <b>15</b>     | <b>24</b>     | <b>39</b>     |
|                                                      | <b>38.46</b>  | <b>61.54</b>  | <b>100.00</b> |
|                                                      | <b>12.40</b>  | <b>22.64</b>  | <b>17.18</b>  |
| Total                                                | <b>121</b>    | <b>106</b>    | <b>227</b>    |
|                                                      | <b>53.30</b>  | <b>46.70</b>  | <b>100.00</b> |
|                                                      | <b>100.00</b> | <b>100.00</b> | <b>100.00</b> |

Fisher's exact = **0.052**  
 1-sided Fisher's exact = **0.031**

**\*ENV: occupat\_expos\_to\_toxics & CASE**

|                          |
|--------------------------|
| Key                      |
| <i>frequency</i>         |
| <i>row percentage</i>    |
| <i>column percentage</i> |

| Occupational exposure to toxics | HolidayCase |         | Total  |
|---------------------------------|-------------|---------|--------|
|                                 | regular     | holiday |        |
| No                              | 109         | 90      | 199    |
|                                 | 54.77       | 45.23   | 100.00 |
|                                 | 90.08       | 84.91   | 87.67  |
| Yes                             | 12          | 16      | 28     |
|                                 | 42.86       | 57.14   | 100.00 |
|                                 | 9.92        | 15.09   | 12.33  |
| Total                           | 121         | 106     | 227    |
|                                 | 53.30       | 46.70   | 100.00 |
|                                 | 100.00      | 100.00  | 100.00 |

Fisher's exact = 0.312  
 1-sided Fisher's exact = 0.163

\*ENV: air\_pollution & CASE

|                          |
|--------------------------|
| Key                      |
| <i>frequency</i>         |
| <i>row percentage</i>    |
| <i>column percentage</i> |

| Air pollution | HolidayCase |         | Total  |
|---------------|-------------|---------|--------|
|               | regular     | holiday |        |
| No            | 102         | 96      | 198    |
|               | 51.52       | 48.48   | 100.00 |
|               | 84.30       | 90.57   | 87.22  |
| Yes           | 19          | 10      | 29     |
|               | 65.52       | 34.48   | 100.00 |
|               | 15.70       | 9.43    | 12.78  |
| Total         | 121         | 106     | 227    |
|               | 53.30       | 46.70   | 100.00 |
|               | 100.00      | 100.00  | 100.00 |

Fisher's exact = **0.170**  
 1-sided Fisher's exact = **0.112**

\*CUL: schooling\_8\_years & CASE

|                          |
|--------------------------|
| Key                      |
| <i>frequency</i>         |
| <i>row percentage</i>    |
| <i>column percentage</i> |

| Schooling<br>< 8 years | HolidayCase   |               | Total         |
|------------------------|---------------|---------------|---------------|
|                        | regular       | holiday       |               |
| No                     | <b>64</b>     | <b>43</b>     | <b>107</b>    |
|                        | <b>59.81</b>  | <b>40.19</b>  | <b>100.00</b> |
|                        | <b>52.89</b>  | <b>40.57</b>  | <b>47.14</b>  |
| Yes                    | <b>57</b>     | <b>63</b>     | <b>120</b>    |
|                        | <b>47.50</b>  | <b>52.50</b>  | <b>100.00</b> |
|                        | <b>47.11</b>  | <b>59.43</b>  | <b>52.86</b>  |
| Total                  | <b>121</b>    | <b>106</b>    | <b>227</b>    |
|                        | <b>53.30</b>  | <b>46.70</b>  | <b>100.00</b> |
|                        | <b>100.00</b> | <b>100.00</b> | <b>100.00</b> |

Fisher's exact = **0.083**  
 1-sided Fisher's exact = **0.042**

\*CUL: insuff\_access\_to\_info & CASE

|                          |
|--------------------------|
| Key                      |
| <i>frequency</i>         |
| <i>row percentage</i>    |
| <i>column percentage</i> |

| Insufficient access to information | HolidayCase |         | Total  |
|------------------------------------|-------------|---------|--------|
|                                    | regular     | holiday |        |
| No                                 | 82          | 69      | 151    |
|                                    | 54.30       | 45.70   | 100.00 |
|                                    | 67.77       | 65.09   | 66.52  |
| Yes                                | 39          | 37      | 76     |
|                                    | 51.32       | 48.68   | 100.00 |
|                                    | 32.23       | 34.91   | 33.48  |
| Total                              | 121         | 106     | 227    |
|                                    | 53.30       | 46.70   | 100.00 |
|                                    | 100.00      | 100.00  | 100.00 |

Fisher's exact = 0.675  
 1-sided Fisher's exact = 0.388

\*CUL: lack\_adher\_screen\_programs & CASE

|                          |
|--------------------------|
| Key                      |
| <i>frequency</i>         |
| <i>row percentage</i>    |
| <i>column percentage</i> |

| Lack of adherence to health screening programs | HolidayCase |         | Total  |
|------------------------------------------------|-------------|---------|--------|
|                                                | regular     | holiday |        |
| No                                             | 88          | 74      | 162    |
|                                                | 54.32       | 45.68   | 100.00 |
|                                                | 72.73       | 69.81   | 71.37  |
| Yes                                            | 33          | 32      | 65     |
|                                                | 50.77       | 49.23   | 100.00 |
|                                                | 27.27       | 30.19   | 28.63  |
| Total                                          | 121         | 106     | 227    |
|                                                | 53.30       | 46.70   | 100.00 |
|                                                | 100.00      | 100.00  | 100.00 |

Fisher's exact = 0.661  
 1-sided Fisher's exact = 0.367

**\*CUL: language\_barriers & CASE**

|                          |
|--------------------------|
| Key                      |
| <i>frequency</i>         |
| <i>row percentage</i>    |
| <i>column percentage</i> |

| Language barriers | HolidayCase |         | Total  |
|-------------------|-------------|---------|--------|
|                   | regular     | holiday |        |
| No                | 117         | 100     | 217    |
|                   | 53.92       | 46.08   | 100.00 |
|                   | 96.69       | 94.34   | 95.59  |
| Yes               | 4           | 6       | 10     |
|                   | 40.00       | 60.00   | 100.00 |
|                   | 3.31        | 5.66    | 4.41   |
| Total             | 121         | 106     | 227    |
|                   | 53.30       | 46.70   | 100.00 |
|                   | 100.00      | 100.00  | 100.00 |

Fisher's exact = **0.521**  
 1-sided Fisher's exact = **0.295**

**\*CUL: perceived\_discrimination & CASE**

|                          |
|--------------------------|
| Key                      |
| <i>frequency</i>         |
| <i>row percentage</i>    |
| <i>column percentage</i> |

| Perceived<br>discrimina<br>tion | HolidayCase   |               | Total         |
|---------------------------------|---------------|---------------|---------------|
|                                 | regular       | holiday       |               |
| No                              | <b>119</b>    | <b>101</b>    | <b>220</b>    |
|                                 | <b>54.09</b>  | <b>45.91</b>  | <b>100.00</b> |
|                                 | <b>98.35</b>  | <b>95.28</b>  | <b>96.92</b>  |
| Yes                             | <b>2</b>      | <b>5</b>      | <b>7</b>      |
|                                 | <b>28.57</b>  | <b>71.43</b>  | <b>100.00</b> |
|                                 | <b>1.65</b>   | <b>4.72</b>   | <b>3.08</b>   |
| Total                           | <b>121</b>    | <b>106</b>    | <b>227</b>    |
|                                 | <b>53.30</b>  | <b>46.70</b>  | <b>100.00</b> |
|                                 | <b>100.00</b> | <b>100.00</b> | <b>100.00</b> |

Fisher's exact = **0.256**  
 1-sided Fisher's exact = **0.172**



```
112 . display in smcl "{newpage}"
```

```

113 .
114 .
115 . *DISCHARGE DIAGNOSIS, TREATMENT AND DRG
116 .
117 .
118 . local DIS CAPDISCHicd9cm1 DRG

119 .
120 . foreach var of local DIS      {
      2.      di _newl "`var' & CASE (no test, description only"
      3.      di _newl
      4.      tab `var' CASE, r co
      5.      di _newl
      6.      }

*CAPDISCHicd9cm1 & CASE (no test, description only

```

|                          |
|--------------------------|
| Key                      |
| <i>frequency</i>         |
| <i>row percentage</i>    |
| <i>column percentage</i> |

| CAPDISCHicd9cm1 | HolidayCase |         | Total  |
|-----------------|-------------|---------|--------|
|                 | regular     | holiday |        |
| 1-infett        | 2           | 6       | 8      |
|                 | 25.00       | 75.00   | 100.00 |
|                 | 1.67        | 5.66    | 3.54   |
| 2-tumori        | 6           | 6       | 12     |
|                 | 50.00       | 50.00   | 100.00 |
|                 | 5.00        | 5.66    | 5.31   |
| 3-endocrino     | 5           | 5       | 10     |
|                 | 50.00       | 50.00   | 100.00 |
|                 | 4.17        | 4.72    | 4.42   |
| 4-ematol        | 8           | 7       | 15     |
|                 | 53.33       | 46.67   | 100.00 |
|                 | 6.67        | 6.60    | 6.64   |
| 5-mental        | 1           | 1       | 2      |
|                 | 50.00       | 50.00   | 100.00 |
|                 | 0.83        | 0.94    | 0.88   |
| 6-neurol        | 5           | 1       | 6      |

|              |        |        |        |
|--------------|--------|--------|--------|
|              | 83.33  | 16.67  | 100.00 |
|              | 4.17   | 0.94   | 2.65   |
| 7-circol     | 34     | 31     | 65     |
|              | 52.31  | 47.69  | 100.00 |
|              | 28.33  | 29.25  | 28.76  |
| 8-respir     | 38     | 33     | 71     |
|              | 53.52  | 46.48  | 100.00 |
|              | 31.67  | 31.13  | 31.42  |
| 9-digerente  | 11     | 3      | 14     |
|              | 78.57  | 21.43  | 100.00 |
|              | 9.17   | 2.83   | 6.19   |
| 10-genitur   | 4      | 7      | 11     |
|              | 36.36  | 63.64  | 100.00 |
|              | 3.33   | 6.60   | 4.87   |
| 13-osteomusc | 1      | 0      | 1      |
|              | 100.00 | 0.00   | 100.00 |
|              | 0.83   | 0.00   | 0.44   |
| 16-sintomi   | 3      | 4      | 7      |
|              | 42.86  | 57.14  | 100.00 |
|              | 2.50   | 3.77   | 3.10   |
| 17-traumi    | 2      | 2      | 4      |
|              | 50.00  | 50.00  | 100.00 |
|              | 1.67   | 1.89   | 1.77   |
| Total        | 120    | 106    | 226    |
|              | 53.10  | 46.90  | 100.00 |
|              | 100.00 | 100.00 | 100.00 |

\*DRG & CASE (no test, description only)

| Key                      |
|--------------------------|
| <i>frequency</i>         |
| <i>row percentage</i>    |
| <i>column percentage</i> |

| DRG | HolidayCase |         | Total  |
|-----|-------------|---------|--------|
|     | regular     | holiday |        |
| 12  | 2           | 0       | 2      |
|     | 100.00      | 0.00    | 100.00 |
|     | 1.68        | 0.00    | 0.89   |
| 14  | 1           | 2       | 3      |
|     | 33.33       | 66.67   | 100.00 |
|     | 0.84        | 1.89    | 1.33   |
| 68  | 2           | 0       | 2      |
|     | 100.00      | 0.00    | 100.00 |
|     | 1.68        | 0.00    | 0.89   |
| 76  | 0           | 1       | 1      |
|     | 0.00        | 100.00  | 100.00 |
|     | 0.00        | 0.94    | 0.44   |
| 78  | 4           | 4       | 8      |
|     | 50.00       | 50.00   | 100.00 |
|     | 3.36        | 3.77    | 3.56   |
| 79  | 1           | 1       | 2      |
|     | 50.00       | 50.00   | 100.00 |
|     | 0.84        | 0.94    | 0.89   |
| 80  | 2           | 0       | 2      |
|     | 100.00      | 0.00    | 100.00 |
|     | 1.68        | 0.00    | 0.89   |
| 82  | 1           | 0       | 1      |
|     | 100.00      | 0.00    | 100.00 |
|     | 0.84        | 0.00    | 0.44   |
| 85  | 0           | 1       | 1      |
|     | 0.00        | 100.00  | 100.00 |
|     | 0.00        | 0.94    | 0.44   |
| 87  | 6           | 3       | 9      |
|     | 66.67       | 33.33   | 100.00 |
|     | 5.04        | 2.83    | 4.00   |
| 88  | 7           | 1       | 8      |
|     | 87.50       | 12.50   | 100.00 |
|     | 5.88        | 0.94    | 3.56   |
| 89  | 20          | 20      | 40     |
|     | 50.00       | 50.00   | 100.00 |
|     | 16.81       | 18.87   | 17.78  |
| 90  | 0           | 1       | 1      |
|     | 0.00        | 100.00  | 100.00 |
|     |             |         |        |

|     |                      |                      |                       |
|-----|----------------------|----------------------|-----------------------|
|     | 0.00                 | 0.94                 | 0.44                  |
| 99  | 1<br>100.00<br>0.84  | 0<br>0.00<br>0.00    | 1<br>100.00<br>0.44   |
| 110 | 0<br>0.00<br>0.00    | 1<br>100.00<br>0.94  | 1<br>100.00<br>0.44   |
| 121 | 8<br>80.00<br>6.72   | 2<br>20.00<br>1.89   | 10<br>100.00<br>4.44  |
| 122 | 1<br>50.00<br>0.84   | 1<br>50.00<br>0.94   | 2<br>100.00<br>0.89   |
| 123 | 0<br>0.00<br>0.00    | 2<br>100.00<br>1.89  | 2<br>100.00<br>0.89   |
| 124 | 1<br>100.00<br>0.84  | 0<br>0.00<br>0.00    | 1<br>100.00<br>0.44   |
| 127 | 17<br>44.74<br>14.29 | 21<br>55.26<br>19.81 | 38<br>100.00<br>16.89 |
| 131 | 2<br>100.00<br>1.68  | 0<br>0.00<br>0.00    | 2<br>100.00<br>0.89   |
| 138 | 1<br>33.33<br>0.84   | 2<br>66.67<br>1.89   | 3<br>100.00<br>1.33   |
| 140 | 0<br>0.00<br>0.00    | 1<br>100.00<br>0.94  | 1<br>100.00<br>0.44   |
| 141 | 0<br>0.00<br>0.00    | 1<br>100.00<br>0.94  | 1<br>100.00<br>0.44   |
| 144 | 1<br>100.00<br>0.84  | 0<br>0.00<br>0.00    | 1<br>100.00<br>0.44   |
| 157 | 1<br>100.00<br>0.84  | 0<br>0.00<br>0.00    | 1<br>100.00<br>0.44   |

|     |                     |                     |                     |
|-----|---------------------|---------------------|---------------------|
| 172 | 1<br>50.00<br>0.84  | 1<br>50.00<br>0.94  | 2<br>100.00<br>0.89 |
| 174 | 2<br>66.67<br>1.68  | 1<br>33.33<br>0.94  | 3<br>100.00<br>1.33 |
| 179 | 5<br>83.33<br>4.20  | 1<br>16.67<br>0.94  | 6<br>100.00<br>2.67 |
| 182 | 0<br>0.00<br>0.00   | 1<br>100.00<br>0.94 | 1<br>100.00<br>0.44 |
| 183 | 0<br>0.00<br>0.00   | 1<br>100.00<br>0.94 | 1<br>100.00<br>0.44 |
| 188 | 1<br>100.00<br>0.84 | 0<br>0.00<br>0.00   | 1<br>100.00<br>0.44 |
| 191 | 0<br>0.00<br>0.00   | 1<br>100.00<br>0.94 | 1<br>100.00<br>0.44 |
| 201 | 1<br>100.00<br>0.84 | 0<br>0.00<br>0.00   | 1<br>100.00<br>0.44 |
| 202 | 2<br>66.67<br>1.68  | 1<br>33.33<br>0.94  | 3<br>100.00<br>1.33 |
| 203 | 0<br>0.00<br>0.00   | 2<br>100.00<br>1.89 | 2<br>100.00<br>0.89 |
| 204 | 0<br>0.00<br>0.00   | 1<br>100.00<br>0.94 | 1<br>100.00<br>0.44 |
| 205 | 0<br>0.00<br>0.00   | 1<br>100.00<br>0.94 | 1<br>100.00<br>0.44 |
| 207 | 1<br>100.00<br>0.84 | 0<br>0.00<br>0.00   | 1<br>100.00<br>0.44 |

|     |                     |                     |                     |
|-----|---------------------|---------------------|---------------------|
| 216 | 1<br>100.00<br>0.84 | 0<br>0.00<br>0.00   | 1<br>100.00<br>0.44 |
| 233 | 0<br>0.00<br>0.00   | 1<br>100.00<br>0.94 | 1<br>100.00<br>0.44 |
| 240 | 0<br>0.00<br>0.00   | 1<br>100.00<br>0.94 | 1<br>100.00<br>0.44 |
| 242 | 1<br>100.00<br>0.84 | 0<br>0.00<br>0.00   | 1<br>100.00<br>0.44 |
| 296 | 2<br>100.00<br>1.68 | 0<br>0.00<br>0.00   | 2<br>100.00<br>0.89 |
| 297 | 1<br>100.00<br>0.84 | 0<br>0.00<br>0.00   | 1<br>100.00<br>0.44 |
| 300 | 0<br>0.00<br>0.00   | 1<br>100.00<br>0.94 | 1<br>100.00<br>0.44 |
| 303 | 0<br>0.00<br>0.00   | 1<br>100.00<br>0.94 | 1<br>100.00<br>0.44 |
| 315 | 0<br>0.00<br>0.00   | 1<br>100.00<br>0.94 | 1<br>100.00<br>0.44 |
| 316 | 2<br>28.57<br>1.68  | 5<br>71.43<br>4.72  | 7<br>100.00<br>3.11 |
| 318 | 0<br>0.00<br>0.00   | 1<br>100.00<br>0.94 | 1<br>100.00<br>0.44 |
| 320 | 1<br>50.00<br>0.84  | 1<br>50.00<br>0.94  | 2<br>100.00<br>0.89 |
| 331 | 0<br>0.00<br>0.00   | 1<br>100.00<br>0.94 | 1<br>100.00<br>0.44 |
| 395 | 2                   | 3                   | 5                   |

|     |                     |                     |                     |
|-----|---------------------|---------------------|---------------------|
|     | 40.00<br>1.68       | 60.00<br>2.83       | 100.00<br>2.22      |
| 397 | 0<br>0.00<br>0.00   | 1<br>100.00<br>0.94 | 1<br>100.00<br>0.44 |
| 401 | 2<br>100.00<br>1.68 | 0<br>0.00<br>0.00   | 2<br>100.00<br>0.89 |
| 403 | 2<br>100.00<br>1.68 | 0<br>0.00<br>0.00   | 2<br>100.00<br>0.89 |
| 414 | 1<br>100.00<br>0.84 | 0<br>0.00<br>0.00   | 1<br>100.00<br>0.44 |
| 423 | 0<br>0.00<br>0.00   | 1<br>100.00<br>0.94 | 1<br>100.00<br>0.44 |
| 450 | 1<br>100.00<br>0.84 | 0<br>0.00<br>0.00   | 1<br>100.00<br>0.44 |
| 477 | 0<br>0.00<br>0.00   | 1<br>100.00<br>0.94 | 1<br>100.00<br>0.44 |
| 521 | 1<br>100.00<br>0.84 | 0<br>0.00<br>0.00   | 1<br>100.00<br>0.44 |
| 548 | 0<br>0.00<br>0.00   | 1<br>100.00<br>0.94 | 1<br>100.00<br>0.44 |
| 551 | 1<br>100.00<br>0.84 | 0<br>0.00<br>0.00   | 1<br>100.00<br>0.44 |
| 557 | 2<br>100.00<br>1.68 | 0<br>0.00<br>0.00   | 2<br>100.00<br>0.89 |
| 562 | 2<br>100.00<br>1.68 | 0<br>0.00<br>0.00   | 2<br>100.00<br>0.89 |
| 565 | 1<br>50.00          | 1<br>50.00          | 2<br>100.00         |



|       | 0.84                   | 0.94                   | 0.89                    |
|-------|------------------------|------------------------|-------------------------|
| 566   | 1<br>50.00<br>0.84     | 1<br>50.00<br>0.94     | 2<br>100.00<br>0.89     |
| 568   | 0<br>0.00<br>0.00      | 1<br>100.00<br>0.94    | 1<br>100.00<br>0.44     |
| 570   | 0<br>0.00<br>0.00      | 1<br>100.00<br>0.94    | 1<br>100.00<br>0.44     |
| 572   | 1<br>100.00<br>0.84    | 0<br>0.00<br>0.00      | 1<br>100.00<br>0.44     |
| 576   | 2<br>25.00<br>1.68     | 6<br>75.00<br>5.66     | 8<br>100.00<br>3.56     |
| Total | 119<br>52.89<br>100.00 | 106<br>47.11<br>100.00 | 225<br>100.00<br>100.00 |

```

121 .
122 . local DISc LOS tariffa NUMmedDISCH

123 .
124 . foreach var of local DISc      {
      2.     di _newl "*" `var' & CASE"
      3.     di _newl
      4.     tabstat `var', by(CASE) c(s) s(n mea sd min q max) f(%4.2f)
      5.     //ttest `var', by(CASE)
125 .     ranksum `var', by(CASE)
      6.     di _newl
      7.     }

```

\*LOS & CASE

Summary for variables: LOS  
by categories of: CASE (HolidayCase)

| CASE    | N      | mean  | sd    | min  | p25   | p50   | p75   |
|---------|--------|-------|-------|------|-------|-------|-------|
| regular | 121.00 | 15.17 | 15.02 | 3.00 | 9.00  | 11.00 | 17.00 |
| holiday | 106.00 | 22.25 | 38.16 | 3.00 | 11.00 | 15.50 | 23.00 |
| Total   | 227.00 | 18.48 | 28.44 | 3.00 | 9.00  | 13.00 | 21.00 |

| CASE    | max    |
|---------|--------|
| regular | 155.00 |
| holiday | 390.00 |
| Total   | 390.00 |

Two-sample Wilcoxon rank-sum (Mann-Whitney) test

| CASE     | obs | rank sum | expected |
|----------|-----|----------|----------|
| regular  | 121 | 12236    | 13794    |
| holiday  | 106 | 13642    | 12084    |
| combined | 227 | 25878    | 25878    |

unadjusted variance    243694.00  
 adjustment for ties    -597.65  


---

 adjusted variance    243096.35

Ho: LOS(CASE==regular) = LOS(CASE==holiday)  
 z = -3.160  
 Prob > |z| = 0.0016

**\*tariffa & CASE**

Summary for variables: tariffa  
 by categories of: CASE (HolidayCase)

| CASE    | N      | mean    | sd      | min     | p25     | p50     | p75     |
|---------|--------|---------|---------|---------|---------|---------|---------|
| regular | 119.00 | 4290.29 | 2396.04 | 1090.00 | 3155.00 | 3642.00 | 4689.00 |
| holiday | 106.00 | 5195.97 | 3980.52 | 1072.00 | 3384.00 | 3983.50 | 5101.00 |
| Total   | 225.00 | 4716.97 | 3264.46 | 1072.00 | 3333.00 | 3642.00 | 4986.00 |

| CASE    | max      |
|---------|----------|
| regular | 13658.00 |
| holiday | 23107.00 |
| Total   | 23107.00 |

Two-sample Wilcoxon rank-sum (Mann-Whitney) test

| CASE     | obs | rank sum | expected |
|----------|-----|----------|----------|
| regular  | 119 | 12350.5  | 13447    |
| holiday  | 106 | 13074.5  | 11978    |
| combined | 225 | 25425    | 25425    |

unadjusted variance 237563.67  
 adjustment for ties -968.20  
 adjusted variance 236595.47

Ho: tariffa(CASE==regular) = tariffa(CASE==holiday)  
 z = -2.254  
 Prob > |z| = 0.0242

**\*NUMmedDISCH & CASE**

Summary for variables: NUMmedDISCH  
 by categories of: CASE (HolidayCase)

| CASE    | N      | mean | sd   | min  | p25  | p50  | p75   |
|---------|--------|------|------|------|------|------|-------|
| regular | 120.00 | 9.27 | 4.54 | 0.00 | 6.50 | 9.00 | 13.00 |
| holiday | 104.00 | 9.11 | 4.97 | 0.00 | 6.00 | 9.00 | 12.00 |
| Total   | 224.00 | 9.19 | 4.74 | 0.00 | 6.00 | 9.00 | 12.00 |

| CASE    | max   |
|---------|-------|
| regular | 20.00 |
| holiday | 22.00 |
| Total   | 22.00 |

Two-sample Wilcoxon rank-sum (Mann-Whitney) test

| CASE     | obs        | rank sum       | expected     |
|----------|------------|----------------|--------------|
| regular  | <b>120</b> | <b>13620.5</b> | <b>13500</b> |
| holiday  | <b>104</b> | <b>11579.5</b> | <b>11700</b> |
| combined | <b>224</b> | <b>25200</b>   | <b>25200</b> |

unadjusted variance    **234000.00**  
adjustment for ties    **-1226.21**

---

adjusted variance      **232773.79**

Ho: NUMmed~H(CASE==regular) = NUMmed~H(CASE==holiday)

z = **0.250**

Prob > |z| = **0.8028**

126 .  
127 . display in smcl "{newpage}"

```

128 .
129 . *OUTCOME
130 .
131 . local OUT DEADinhosp DEAD30 READMISS30 DEAD_READM30

132 .
133 . foreach var of local OUT      {
      2.      di _newl "`var' & CASE (no test, description only"
      3.      di _newl
      4.      tab `var' CASE, r co ex
      5.      di _newl
      6.      }

*DEADinhosp & CASE (no test, description only

```

|                          |
|--------------------------|
| Key                      |
| <i>frequency</i>         |
| <i>row percentage</i>    |
| <i>column percentage</i> |

| DEADinhosp | HolidayCase |         | Total  |
|------------|-------------|---------|--------|
|            | regular     | holiday |        |
| 0          | 117         | 94      | 211    |
|            | 55.45       | 44.55   | 100.00 |
|            | 96.69       | 88.68   | 92.95  |
| 1          | 4           | 12      | 16     |
|            | 25.00       | 75.00   | 100.00 |
|            | 3.31        | 11.32   | 7.05   |
| Total      | 121         | 106     | 227    |
|            | 53.30       | 46.70   | 100.00 |
|            | 100.00      | 100.00  | 100.00 |

Fisher's exact = 0.021  
 1-sided Fisher's exact = 0.017

```
*DEAD30 & CASE (no test, description only
```

|                          |
|--------------------------|
| Key                      |
| <i>frequency</i>         |
| <i>row percentage</i>    |
| <i>column percentage</i> |

| DEAD30 | HolidayCase |         | Total  |
|--------|-------------|---------|--------|
|        | regular     | holiday |        |
| 0      | 115         | 92      | 207    |
|        | 55.56       | 44.44   | 100.00 |
|        | 95.04       | 86.79   | 91.19  |
| 1      | 6           | 14      | 20     |
|        | 30.00       | 70.00   | 100.00 |
|        | 4.96        | 13.21   | 8.81   |
| Total  | 121         | 106     | 227    |
|        | 53.30       | 46.70   | 100.00 |
|        | 100.00      | 100.00  | 100.00 |

Fisher's exact = 0.035  
 1-sided Fisher's exact = 0.025

**\*READMISS30 & CASE (no test, description only)**

|                          |
|--------------------------|
| Key                      |
| <i>frequency</i>         |
| <i>row percentage</i>    |
| <i>column percentage</i> |

| READMISS30 | HolidayCase |         | Total  |
|------------|-------------|---------|--------|
|            | regular     | holiday |        |
| 0          | 49          | 55      | 104    |
|            | 47.12       | 52.88   | 100.00 |
|            | 79.03       | 80.88   | 80.00  |
| 1          | 13          | 13      | 26     |
|            | 50.00       | 50.00   | 100.00 |
|            | 20.97       | 19.12   | 20.00  |
| Total      | 62          | 68      | 130    |
|            | 47.69       | 52.31   | 100.00 |

| 100.00 100.00 | 100.00

Fisher's exact = 0.829  
 1-sided Fisher's exact = 0.482

**\*DEAD\_READM30 & CASE (no test, description only**

|                          |
|--------------------------|
| Key                      |
| <i>frequency</i>         |
| <i>row percentage</i>    |
| <i>column percentage</i> |

| DEAD_READM<br>30 | HolidayCase |         | Total  |
|------------------|-------------|---------|--------|
|                  | regular     | holiday |        |
| 0                | 104         | 82      | 186    |
|                  | 55.91       | 44.09   | 100.00 |
|                  | 85.95       | 77.36   | 81.94  |
| 1                | 17          | 24      | 41     |
|                  | 41.46       | 58.54   | 100.00 |
|                  | 14.05       | 22.64   | 18.06  |
| Total            | 121         | 106     | 227    |
|                  | 53.30       | 46.70   | 100.00 |
|                  | 100.00      | 100.00  | 100.00 |

Fisher's exact = 0.119  
 1-sided Fisher's exact = 0.066

```
134 .  
135 . display in smcl "{newpage}"
```

```

136 .
137 .
138 . *-----
139 . *(Q2)INDEPENDENT CORRELATES OF HOLIDAY CASE
140 . *MULTIVARIABLE ANALYSIS
141 . *-----
142 .
143 . *check collinearity
144 .
145 . corr age sex edmonton_frail_scale_5 income_1000_month need_for_a_caregiver inappropri
> ate_diet home_architect_barriers schooling_8_years
(obs=226)

```

|              | age      | sex     | edmont~5 | income~h | need_f~r | inappr~t | home_a~s |
|--------------|----------|---------|----------|----------|----------|----------|----------|
| age          | 1.0000   |         |          |          |          |          |          |
| sex          | 0.0644   | 1.0000  |          |          |          |          |          |
| edmonton_f~5 | 0.3412   | -0.0307 | 1.0000   |          |          |          |          |
| income_100~h | -0.0954  | 0.1354  | 0.0844   | 1.0000   |          |          |          |
| need_for_a~r | 0.3665   | 0.0955  | 0.5813   | 0.0654   | 1.0000   |          |          |
| inappropri~t | -0.1552  | 0.1117  | 0.0490   | 0.1922   | 0.0142   | 1.0000   |          |
| home_archi~s | 0.0783   | 0.0432  | 0.0889   | 0.0101   | 0.1409   | 0.0585   | 1.0000   |
| schooling_~s | 0.4253   | 0.1516  | 0.2728   | 0.1637   | 0.2972   | -0.0365  | 0.1282   |
|              | school~s |         |          |          |          |          |          |
| schooling_~s | 1.0000   |         |          |          |          |          |          |

```

146 . //edmonton & need for a caregiver are collinear-choice is edmonton (Marco)
147 .
148 . corr M_CCI_BIO M_CCI_SOC M_CCI_BEH M_CCI_ENV M_CCI_CUL
(obs=237)

```

|           | M_CCI_~O | M_CCI_~C | M_CCI_~H | M_CCI_~V | M_CCI_~L |
|-----------|----------|----------|----------|----------|----------|
| M_CCI_BIO | 1.0000   |          |          |          |          |
| M_CCI_SOC | 0.0113   | 1.0000   |          |          |          |
| M_CCI_BEH | 0.0069   | 0.0785   | 1.0000   |          |          |
| M_CCI_ENV | 0.1950   | 0.1145   | 0.1252   | 1.0000   |          |
| M_CCI_CUL | 0.0184   | 0.1253   | 0.2494   | 0.1662   | 1.0000   |



```
149 .
150 . tab CASE
```

| HolidayCase | Freq. | Percent | Cum.   |
|-------------|-------|---------|--------|
| regular     | 121   | 53.30   | 53.30  |
| holiday     | 106   | 46.70   | 100.00 |
| Total       | 227   | 100.00  |        |

```
151 .
152 . *Model with single elements of CCI
153 .
154 . //with Edmonton frail scale
155 .
156 . logistic CASE age sex i.edmonton_frail_scale_5 i.income_1000_month ///
> i.inappropriate_diet i.home_architect_barriers i.schooling_8_years, nolog
```

```
Logistic regression                                Number of obs      =      226
                                                    LR chi2(7)         =      27.13
                                                    Prob > chi2        =      0.0003
Log likelihood = -142.52064                       Pseudo R2          =      0.0869
```

| CASE          | Odds Ratio | Std. Err. | z      | P> z  | [95% Conf. Interval] |
|---------------|------------|-----------|--------|-------|----------------------|
| age           | 1.02       | 0.01      | 2.063  | 0.039 | 1.00 1.05            |
| sex           | 1.07       | 0.31      | 0.231  | 0.817 | 0.60 1.89            |
| edmonton_fr~5 |            |           |        |       |                      |
| No            | 1.00       | (base)    |        |       |                      |
| Yes           | 1.85       | 0.66      | 1.732  | 0.083 | 0.92 3.72            |
| income_1000~h |            |           |        |       |                      |
| No            | 1.00       | (base)    |        |       |                      |
| Yes           | 1.97       | 0.59      | 2.275  | 0.023 | 1.10 3.55            |
| inappropria~t |            |           |        |       |                      |
| No            | 1.00       | (base)    |        |       |                      |
| Yes           | 2.29       | 0.90      | 2.101  | 0.036 | 1.06 4.95            |
| home_archit~s |            |           |        |       |                      |
| No            | 1.00       | (base)    |        |       |                      |
| Yes           | 1.88       | 0.71      | 1.664  | 0.096 | 0.89 3.95            |
| schooling_8~s |            |           |        |       |                      |
| No            | 1.00       | (base)    |        |       |                      |
| Yes           | 0.93       | 0.30      | -0.230 | 0.818 | 0.49 1.75            |
| _cons         | 0.04       | 0.04      | -3.453 | 0.001 | 0.01 0.26            |

Note: **\_cons** estimates baseline odds.



```
157 .
158 . estat gof
```

**Logistic model for CASE, goodness-of-fit test**

```
number of observations = 226
number of covariate patterns = 195
Pearson chi2(187) = 186.25
Prob > chi2 = 0.5018
```

```
159 . lroc, nog
```

Logistic model for CASE

```
number of observations = 226
area under ROC curve = 0.6900
```

```
160 .
161 . //with Need for caregiver
162 .
163 . logistic CASE age sex i.need_for_a_caregiver i.income_1000_month ///
> i.inappropriate_diet i.home_architect_barriers i.schooling_8_years, nolog
```

```
Logistic regression          Number of obs   = 226
                             LR chi2(7)           = 26.00
                             Prob > chi2          = 0.0005
Log likelihood = -143.08456   Pseudo R2       = 0.0833
```

| CASE          | Odds Ratio | Std. Err. | z      | P> z  | [95% Conf. Interval] |      |
|---------------|------------|-----------|--------|-------|----------------------|------|
| age           | 1.03       | 0.01      | 2.143  | 0.032 | 1.00                 | 1.05 |
| sex           | 1.00       | 0.29      | -0.016 | 0.987 | 0.56                 | 1.76 |
| need_for_a~r  |            |           |        |       |                      |      |
| No            | 1.00       | (base)    |        |       |                      |      |
| Yes           | 1.56       | 0.50      | 1.387  | 0.166 | 0.83                 | 2.91 |
| income_1000~h |            |           |        |       |                      |      |
| No            | 1.00       | (base)    |        |       |                      |      |
| Yes           | 2.01       | 0.60      | 2.335  | 0.020 | 1.12                 | 3.61 |
| inappropria~t |            |           |        |       |                      |      |
| No            | 1.00       | (base)    |        |       |                      |      |
| Yes           | 2.37       | 0.93      | 2.200  | 0.028 | 1.10                 | 5.11 |
| home_archit~s |            |           |        |       |                      |      |
| No            | 1.00       | (base)    |        |       |                      |      |
| Yes           | 1.83       | 0.69      | 1.584  | 0.113 | 0.87                 | 3.85 |
| schooling_8~s |            |           |        |       |                      |      |
| No            | 1.00       | (base)    |        |       |                      |      |



|       |             |             |               |              |             |             |
|-------|-------------|-------------|---------------|--------------|-------------|-------------|
| Yes   | <b>0.94</b> | <b>0.30</b> | <b>-0.198</b> | <b>0.843</b> | <b>0.50</b> | <b>1.77</b> |
| _cons | <b>0.05</b> | <b>0.05</b> | <b>-3.316</b> | <b>0.001</b> | <b>0.01</b> | <b>0.30</b> |

Note: **\_cons** estimates baseline odds.

```
164 .
165 . estat gof
```

**Logistic model for CASE, goodness-of-fit test**

```
number of observations = 226
number of covariate patterns = 197
Pearson chi2(189) = 190.75
Prob > chi2 = 0.4506
```

```
166 . lroc, nog
```

Logistic model for CASE

```
number of observations = 226
area under ROC curve = 0.6869
```

```
167 .
168 .
169 . *Model with CCI_TOT
170 .
171 . logistic CASE age sex CCI_TOT, nolog
```

```
Logistic regression          Number of obs   = 227
                             LR chi2(3)           = 13.31
                             Prob > chi2          = 0.0040
Log likelihood = -150.19354   Pseudo R2      = 0.0424
```

| CASE    | Odds Ratio  | Std. Err.   | z             | P> z         | [95% Conf. Interval] |
|---------|-------------|-------------|---------------|--------------|----------------------|
| age     | <b>1.02</b> | <b>0.01</b> | <b>1.655</b>  | <b>0.098</b> | <b>1.00 1.04</b>     |
| sex     | <b>1.17</b> | <b>0.32</b> | <b>0.563</b>  | <b>0.573</b> | <b>0.68 2.00</b>     |
| CCI_TOT | <b>1.06</b> | <b>0.03</b> | <b>2.466</b>  | <b>0.014</b> | <b>1.01 1.12</b>     |
| _cons   | <b>0.08</b> | <b>0.07</b> | <b>-3.114</b> | <b>0.002</b> | <b>0.02 0.39</b>     |

Note: **\_cons** estimates baseline odds.

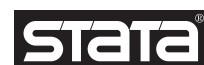

```

172 .
173 .
174 . *Model with components of CCI
175 .
176 . logistic CASE age sex i.M_CCI_BIO i.M_CCI_SOC ///
> i.M_CCI_BEH i.M_CCI_ENV i.M_CCI_CUL, nolog
    
```

```

Logistic regression                               Number of obs   =      227
                                                    LR chi2(7)      =     15.04
                                                    Prob > chi2     =     0.0355
Log likelihood = -149.32987                       Pseudo R2      =     0.0479
    
```

| CASE      | Odds Ratio | Std. Err. | z      | P> z  | [95% Conf. Interval] |
|-----------|------------|-----------|--------|-------|----------------------|
| age       | 1.03       | 0.01      | 2.505  | 0.012 | 1.01 1.05            |
| sex       | 1.24       | 0.35      | 0.764  | 0.445 | 0.72 2.15            |
| M_CCI_BIO |            |           |        |       |                      |
| 1         | 1.00       | (base)    |        |       |                      |
| 2         | 1.07       | 0.33      | 0.219  | 0.827 | 0.58 1.97            |
| M_CCI_SOC |            |           |        |       |                      |
| 1         | 1.00       | (base)    |        |       |                      |
| 2         | 1.63       | 0.66      | 1.218  | 0.223 | 0.74 3.59            |
| M_CCI_BEH |            |           |        |       |                      |
| 1         | 1.00       | (base)    |        |       |                      |
| 2         | 1.93       | 0.65      | 1.951  | 0.051 | 1.00 3.74            |
| M_CCI_ENV |            |           |        |       |                      |
| 1         | 1.00       | (base)    |        |       |                      |
| 2         | 1.32       | 0.38      | 0.973  | 0.331 | 0.75 2.31            |
| M_CCI_CUL |            |           |        |       |                      |
| 1         | 1.00       | (base)    |        |       |                      |
| 2         | 1.02       | 0.31      | 0.079  | 0.937 | 0.57 1.85            |
| _cons     | 0.06       | 0.06      | -3.153 | 0.002 | 0.01 0.35            |

Note: **\_cons** estimates baseline odds.

```
177 .  
178 . estat gof
```

**Logistic model for CASE, goodness-of-fit test**

---

```
      number of observations =      227  
number of covariate patterns =      202  
      Pearson chi2(194) =      204.59  
      Prob > chi2 =      0.2871
```

```
179 . lroc, nog
```

Logistic model for CASE

```
number of observations =      227  
area under ROC curve   =      0.6306
```

```
180 .  
181 .  
182 . display in smcl "{newpage}"
```
